# Supplementary material for: Genetic architecture of complex traits and disease risk predictors
Source: PubMed Central journal article supplement (PMC7374622; doi:10.1038/s41598-020-68881-8), 2020-07-21
Supplement: 41598_2020_68881_MOESM1_ESM.pdf [file 41598_2020_68881_MOESM1_ESM.pdf]

# Genetic Architecture of Complex Traits and Disease Risk Predictors

Soke Yuen Yong <sup>\*1</sup>, Timothy G. Raben <sup>†1</sup>, Louis Lello <sup>‡1,2</sup>, and Stephen D.H. Hsu <sup>§1,2</sup>

<sup>1</sup>Department of Physics and Astronomy, Michigan State University

<sup>2</sup>Genomic Prediction, North Brunswick, NJ

## Supplementary Information

### Appendix A: Supplementary Figures

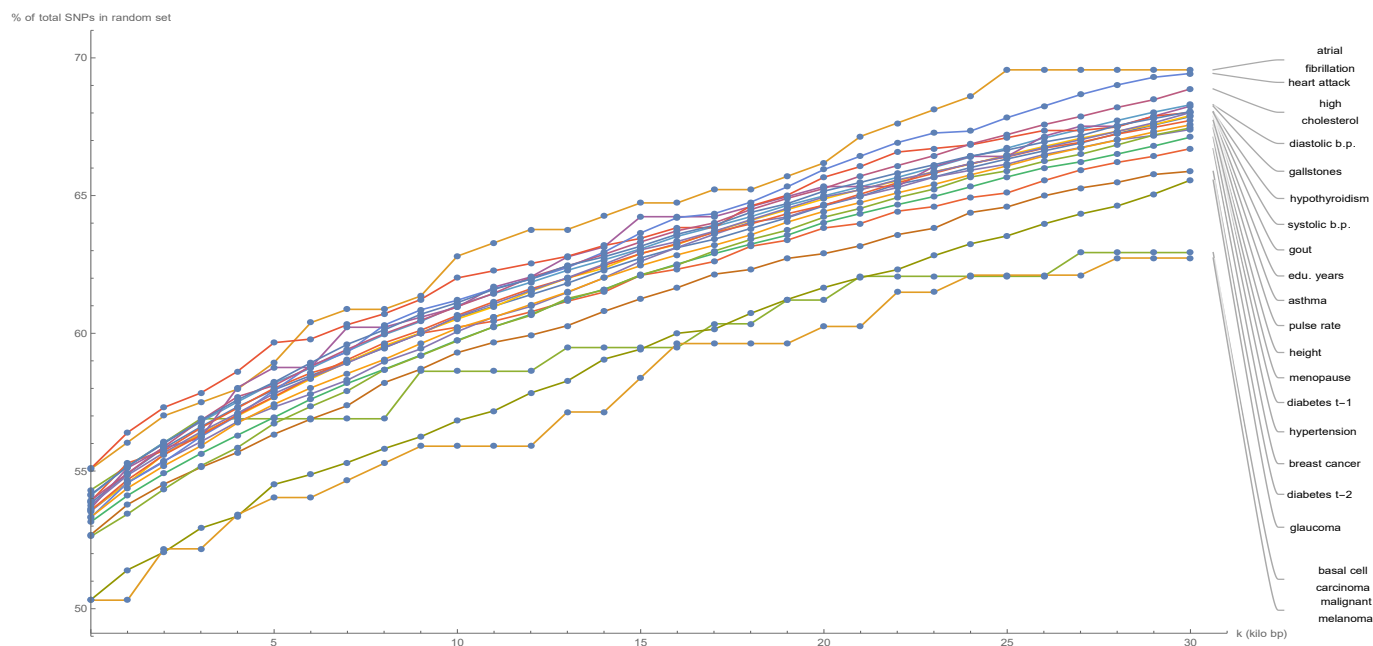

Supplementary Figure S1: *Plots of the number of random SNPs located within genic regions, expressed as a percentage of the total number of SNPs in a randomly-selected set containing the same number of SNPs as the activated set in the predictor for the indicated disease condition/trait, against expansion of GENCODE Release 19 gene boundaries by  $k$  kilo base pairs. SNPS were randomly selected from the 800,000+ variants measured by the UK Biobank Axiom Array.*

\*Corresponding Author: yongsoke@msu.edu

†rabentim@msu.edu

‡lollou@msu.edu

§hsu@msu.edu

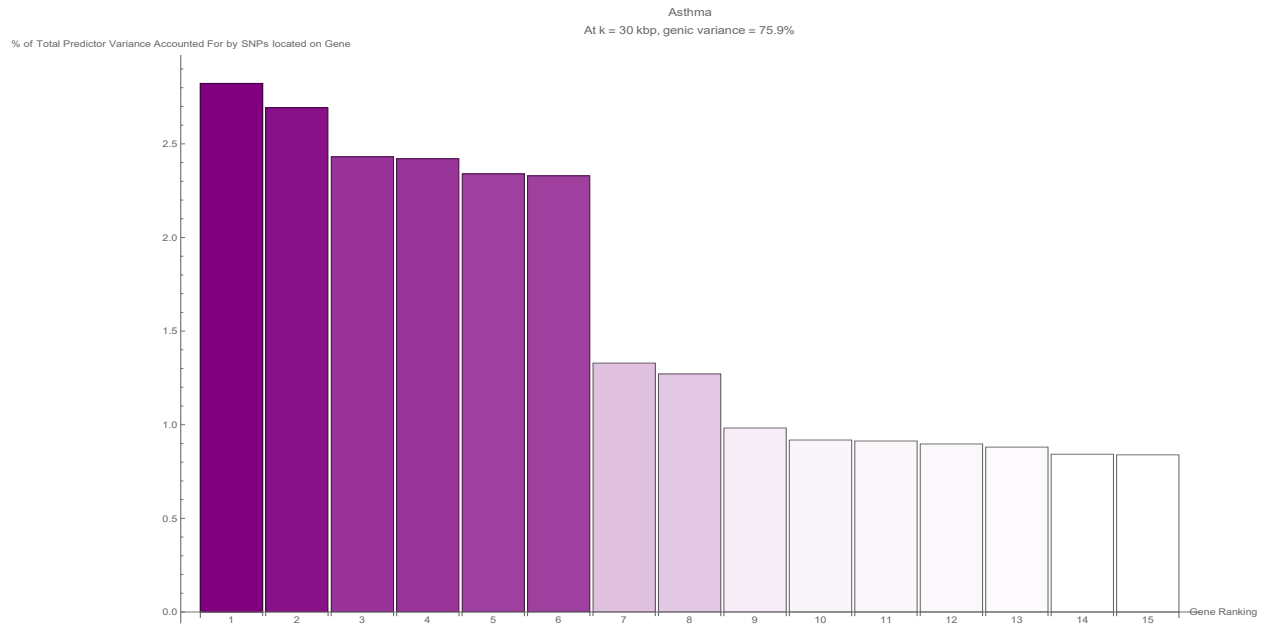

Supplementary Figure S2: *The fifteen largest total values of variance accounted for by predictor SNPs located on a single gene (in terms of the percentage of total variance accounted for by all predictor SNPs) for the asthma predictor. Each vertical bar is colored violet with a depth of shade proportional to the height of the bar. Here, 'genic' SNPs are contained within the GENCODE Release 19 gene boundaries plus 30 kilo base pairs at both ends.*

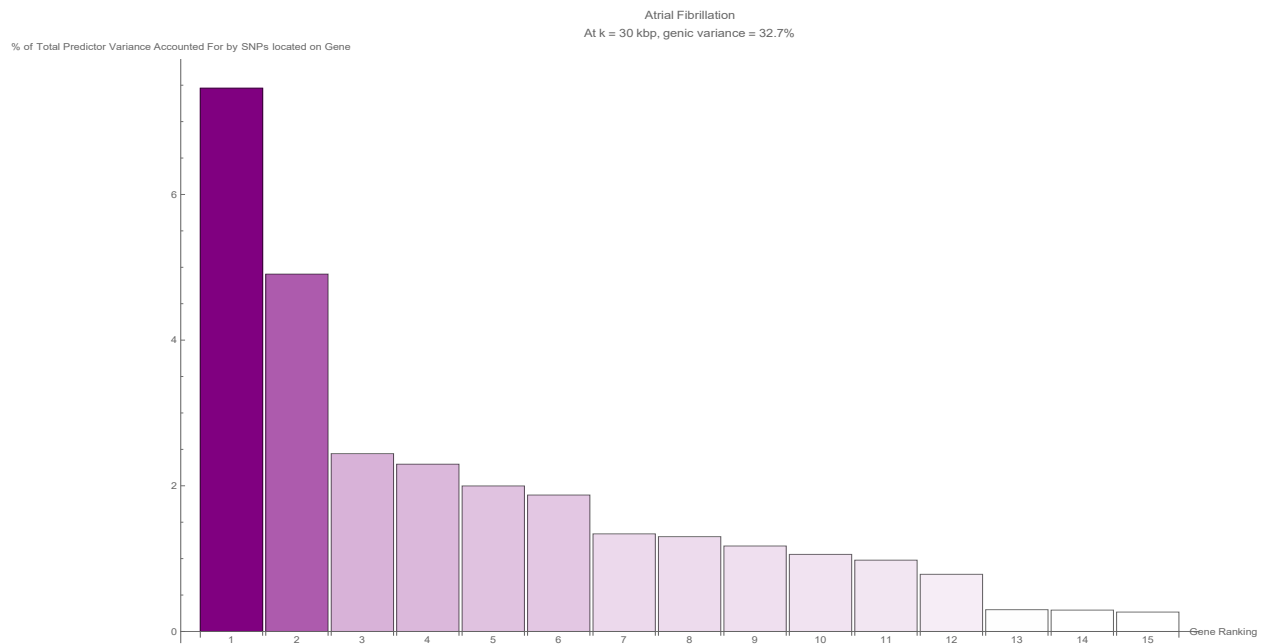

Supplementary Figure S3: *The fifteen largest total values of variance accounted for by predictor SNPs located on a single gene (in terms of the percentage of total variance accounted for by all predictor SNPs) for the atrial fibrillation predictor. Each vertical bar is colored violet with a depth of shade proportional to the height of the bar. Here, 'genic' SNPs are contained within the GENCODE Release 19 gene boundaries plus 30 kilo base pairs at both ends.*

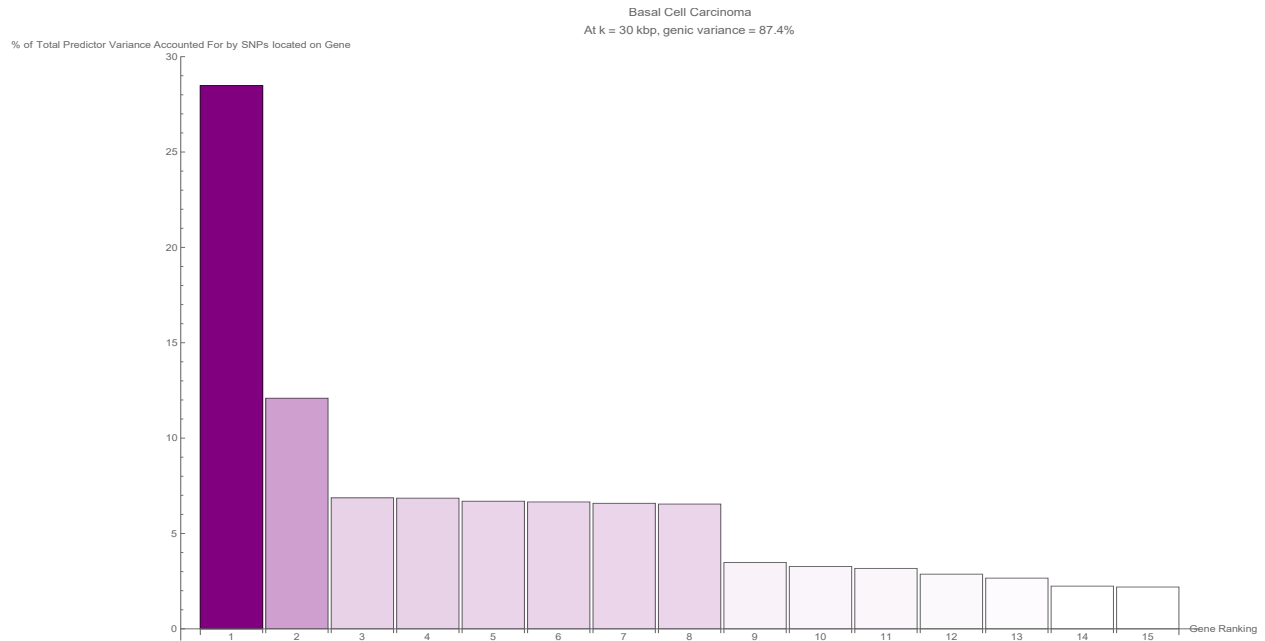

Supplementary Figure S4: *The fifteen largest total values of variance accounted for by predictor SNPs located on a single gene (in terms of the percentage of total variance accounted for by all predictor SNPs) for the basal cell carcinoma predictor. Each vertical bar is colored violet with a depth of shade proportional to the height of the bar. Here, 'genic' SNPs are contained within the GENCODE Release 19 gene boundaries plus 30 kilo base pairs at both ends.*

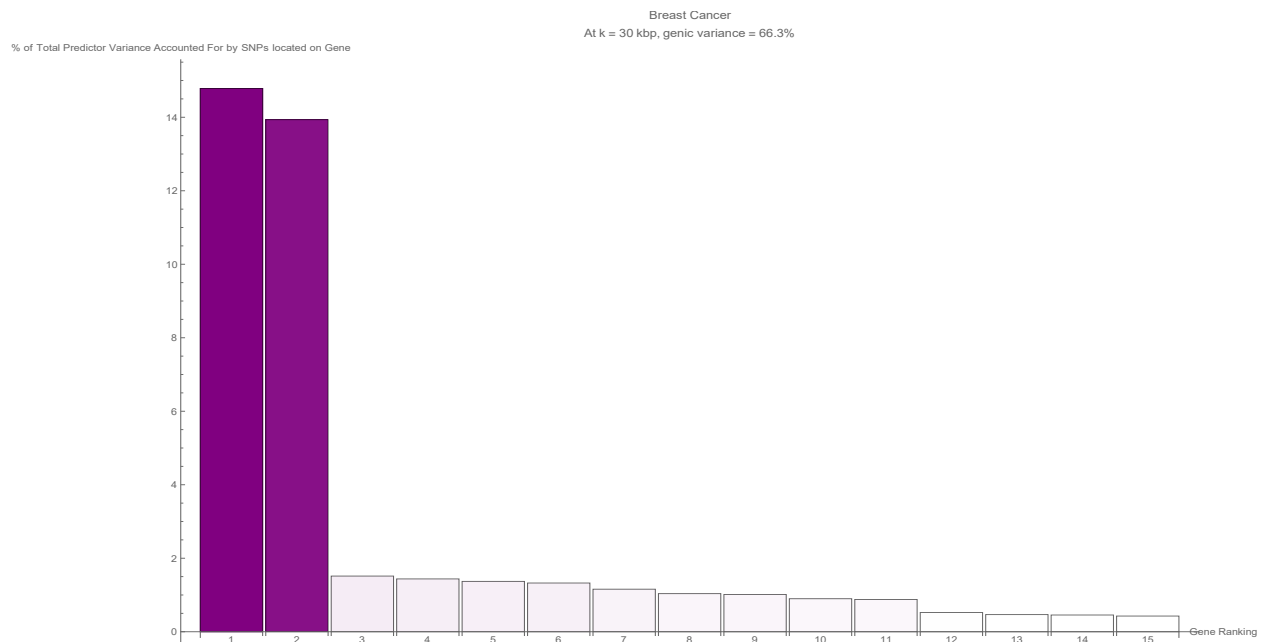

Supplementary Figure S5: *The fifteen largest total values of variance accounted for by predictor SNPs located on a single gene (in terms of the percentage of total variance accounted for by all predictor SNPs) for the breast cancer predictor. Each vertical bar is colored violet with a depth of shade proportional to the height of the bar. Here, 'genic' SNPs are contained within the GENCODE Release 19 gene boundaries plus 30 kilo base pairs at both ends.*

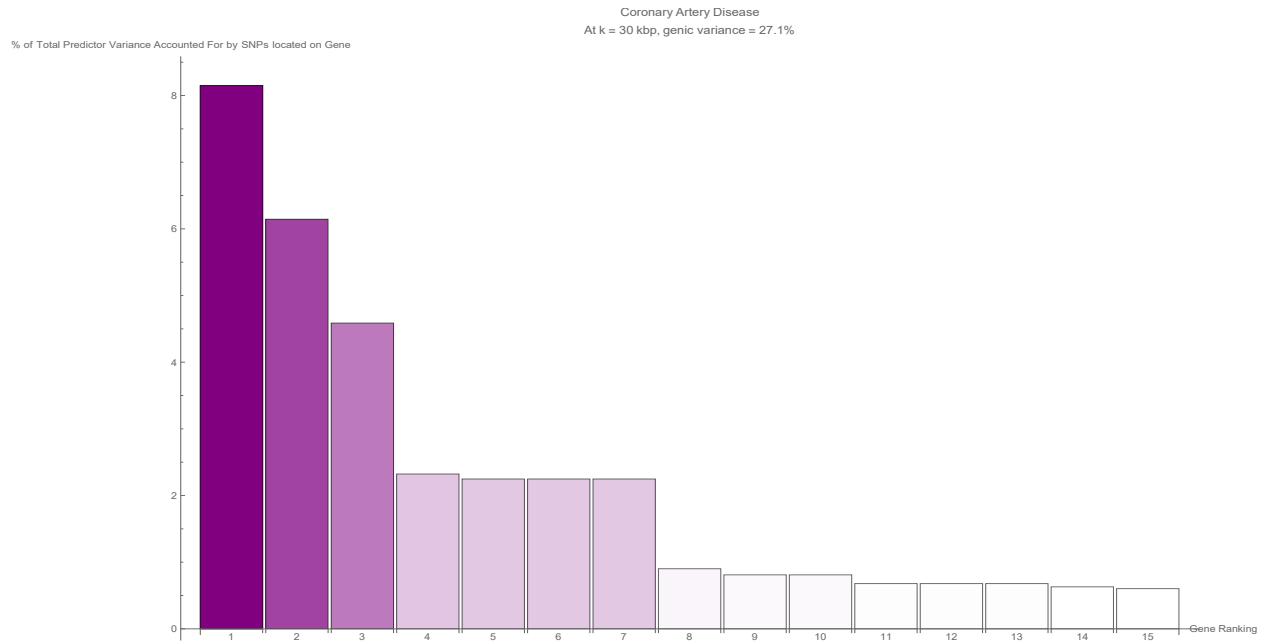

Supplementary Figure S6: *The fifteen largest total values of variance accounted for by predictor SNPs located on a single gene (in terms of the percentage of total variance accounted for by all predictor SNPs) for the coronary artery disease predictor. Each vertical bar is colored violet with a depth of shade proportional to the height of the bar. Here, 'genic' SNPs are contained within the GENCODE Release 19 gene boundaries plus 30 kilo base pairs at both ends.*

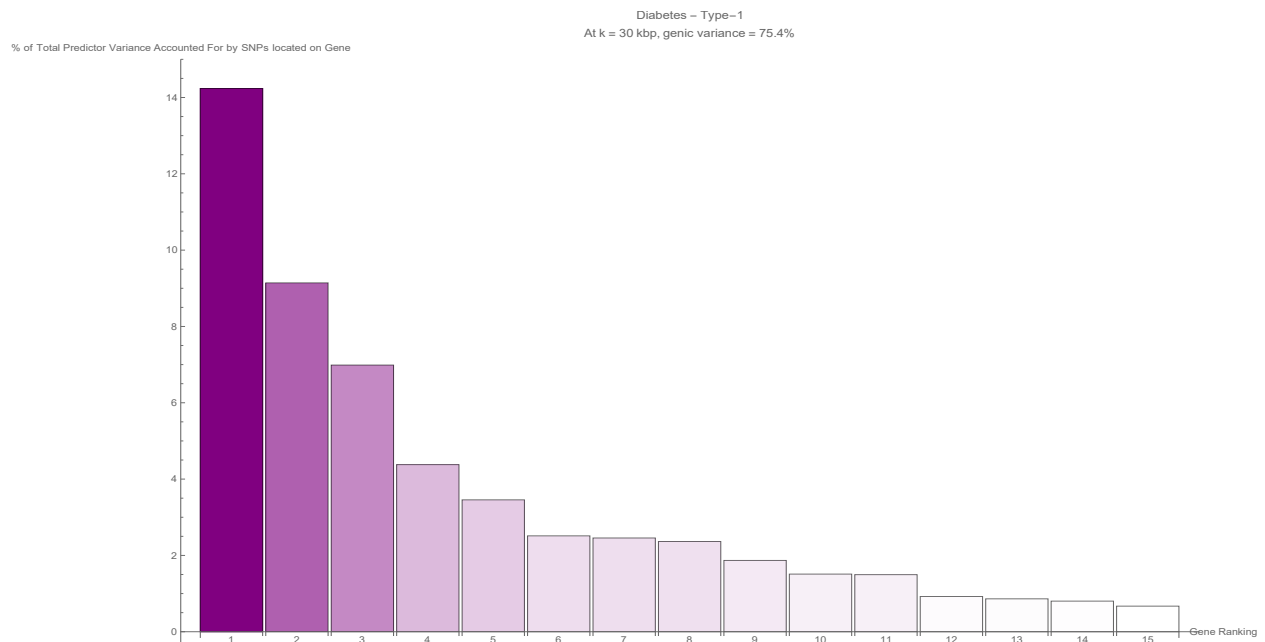

Supplementary Figure S7: *The fifteen largest total values of variance accounted for by predictor SNPs located on a single gene (in terms of the percentage of total variance accounted for by all predictor SNPs) for the type-1 diabetes predictor. Each vertical bar is colored violet with a depth of shade proportional to the height of the bar. Here, 'genic' SNPs are contained within the GENCODE Release 19 gene boundaries plus 30 kilo base pairs at both ends.*

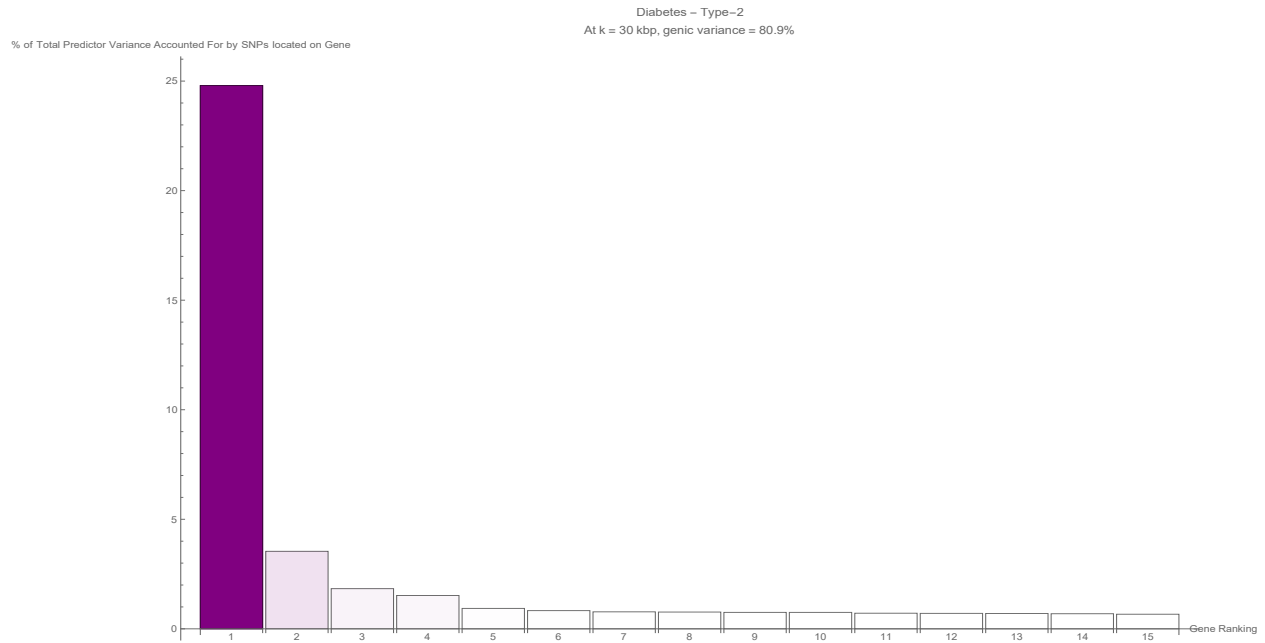

Supplementary Figure S8: *The fifteen largest total values of variance accounted for by predictor SNPs located on a single gene (in terms of the percentage of total variance accounted for by all predictor SNPs) for the type-2 diabetes predictor. Each vertical bar is colored violet with a depth of shade proportional to the height of the bar. Here, 'genic' SNPs are contained within the GENCODE Release 19 gene boundaries plus 30 kilo base pairs at both ends.*

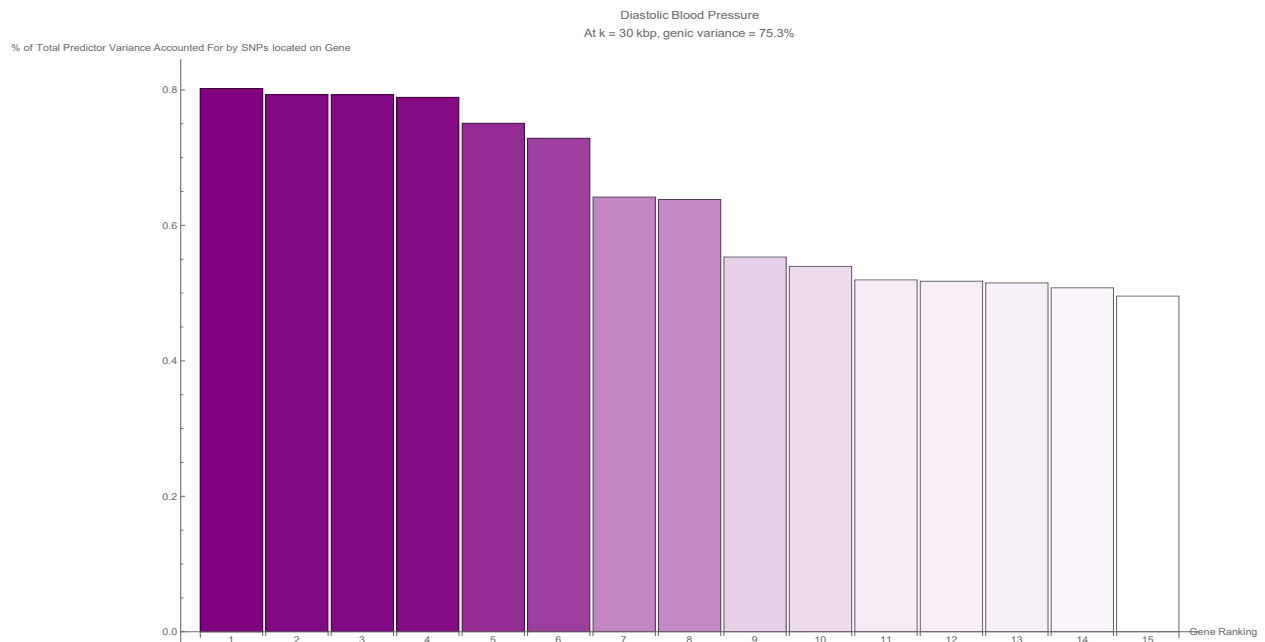

Supplementary Figure S9: *The fifteen largest total values of variance accounted for by predictor SNPs located on a single gene (in terms of the percentage of total variance accounted for by all predictor SNPs) for the diastolic blood pressure predictor. Each vertical bar is colored violet with a depth of shade proportional to the height of the bar. Here, 'genic' SNPs are contained within the GENCODE Release 19 gene boundaries plus 30 kilo base pairs at both ends.*

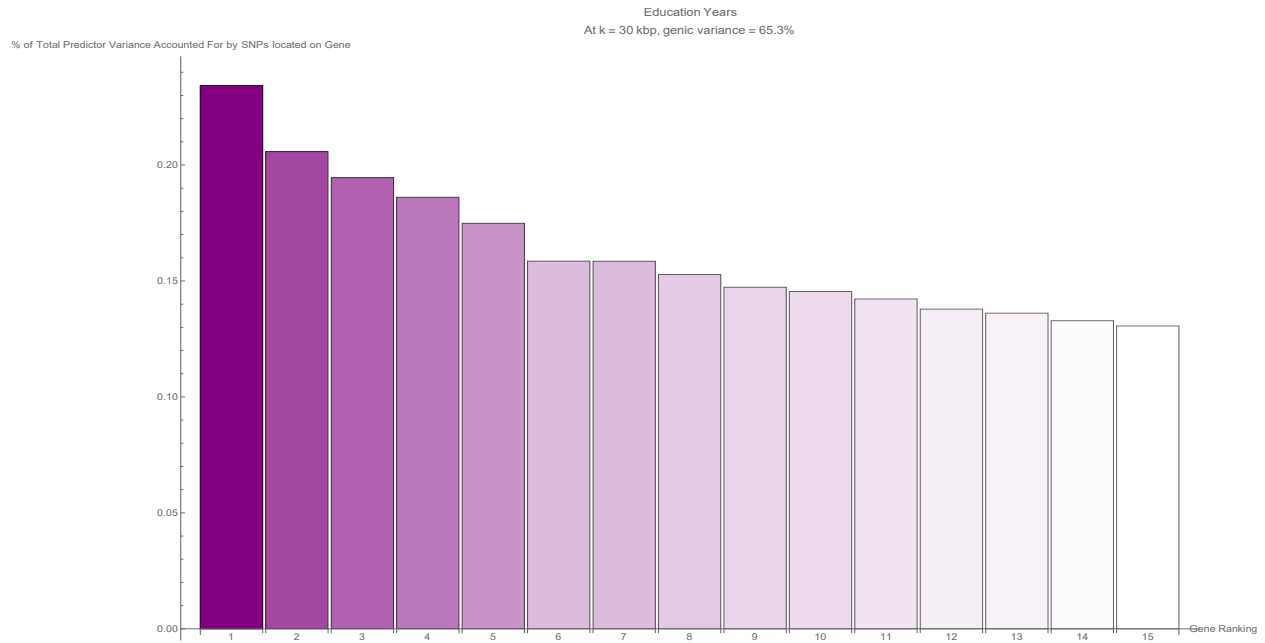

Supplementary Figure S10: *The fifteen largest total values of variance accounted for by predictor SNPs located on a single gene (in terms of the percentage of total variance accounted for by all predictor SNPs) for the education years predictor. Each vertical bar is colored violet with a depth of shade proportional to the height of the bar. Here, 'genic' SNPs are contained within the GENCODE Release 19 gene boundaries plus 30 kilo base pairs at both ends.*

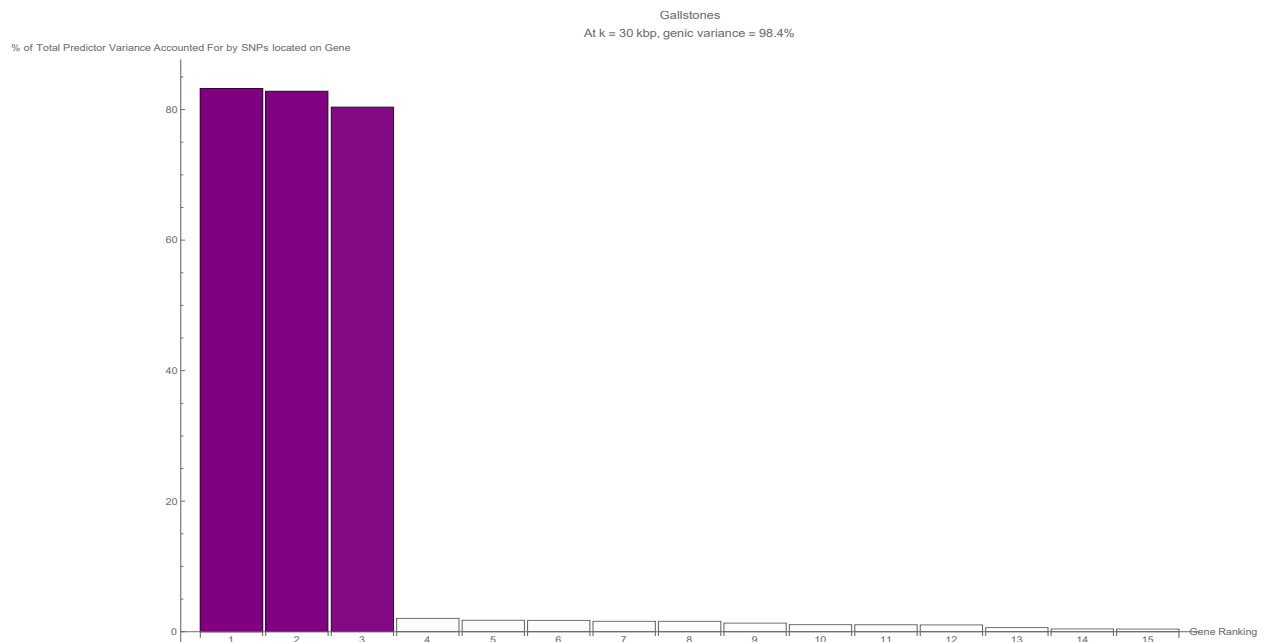

Supplementary Figure S11: *The fifteen largest total values of variance accounted for by predictor SNPs located on a single gene (in terms of the percentage of total variance accounted for by all predictor SNPs) for the gallstones predictor. Each vertical bar is colored violet with a depth of shade proportional to the height of the bar. Here, 'genic' SNPs are contained within the GENCODE Release 19 gene boundaries plus 30 kilo base pairs at both ends.*

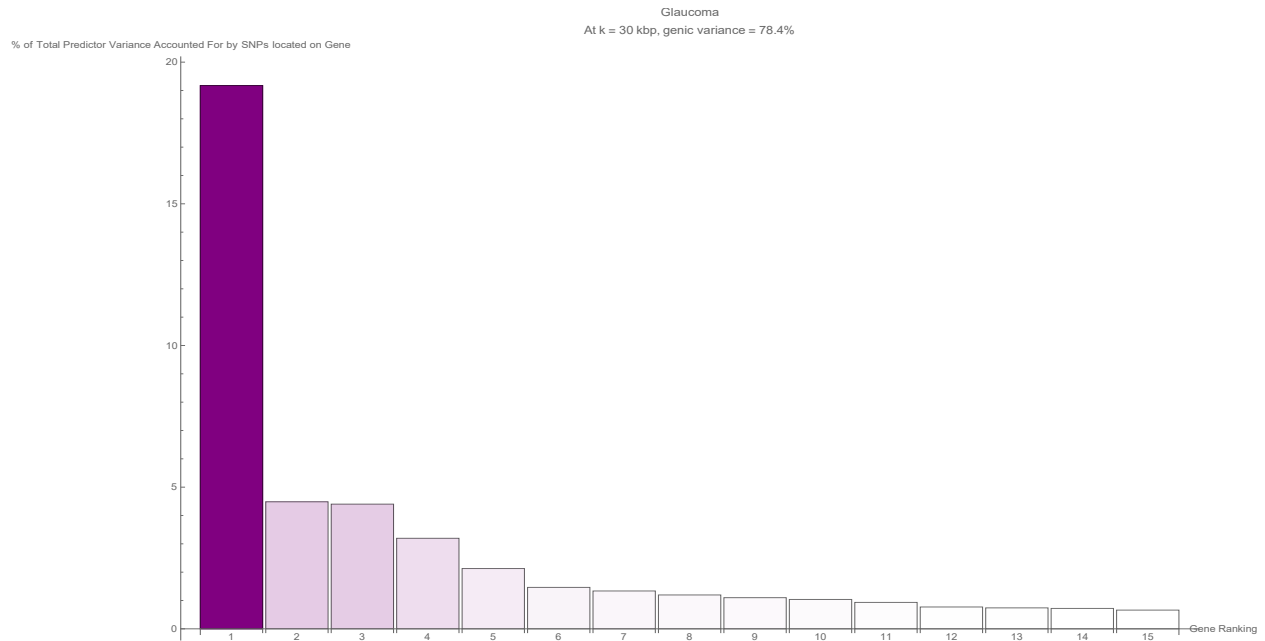

Supplementary Figure S12: *The fifteen largest total values of variance accounted for by predictor SNPs located on a single gene (in terms of the percentage of total variance accounted for by all predictor SNPs) for the glaucoma predictor. Each vertical bar is colored violet with a depth of shade proportional to the height of the bar. Here, 'genic' SNPs are contained within the GENCODE Release 19 gene boundaries plus 30 kilo base pairs at both ends.*

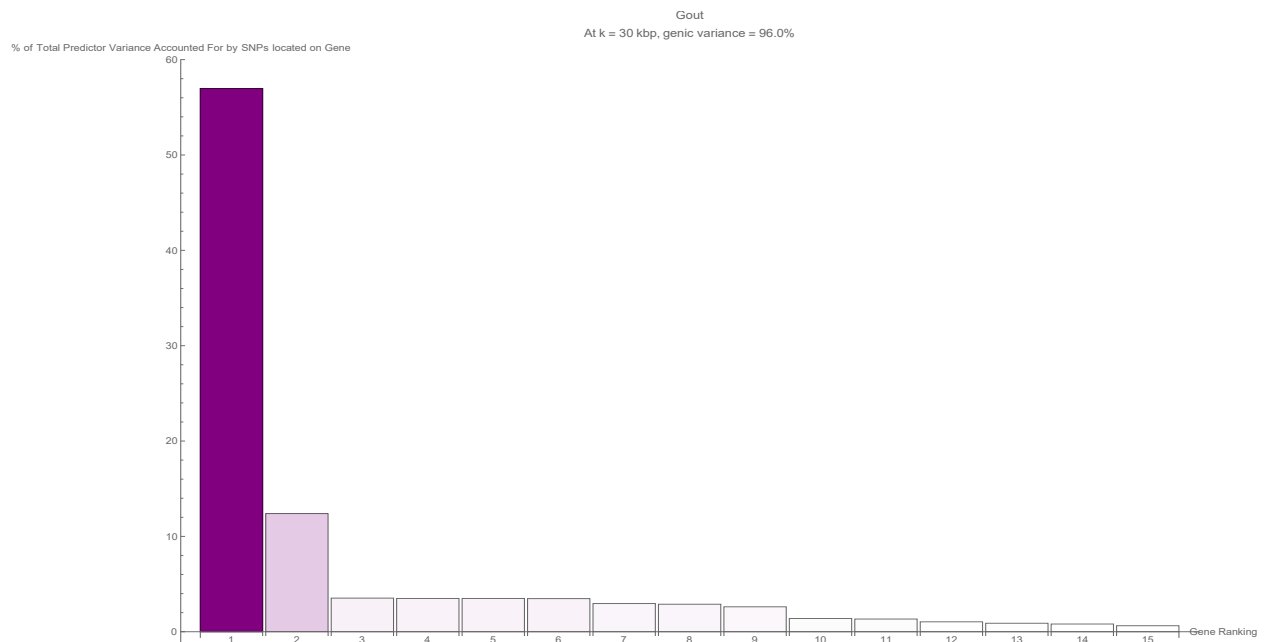

Supplementary Figure S13: *The fifteen largest total values of variance accounted for by predictor SNPs located on a single gene (in terms of the percentage of total variance accounted for by all predictor SNPs) for the gout predictor. Each vertical bar is colored violet with a depth of shade proportional to the height of the bar. Here, 'genic' SNPs are contained within the GENCODE Release 19 gene boundaries plus 30 kilo base pairs at both ends.*

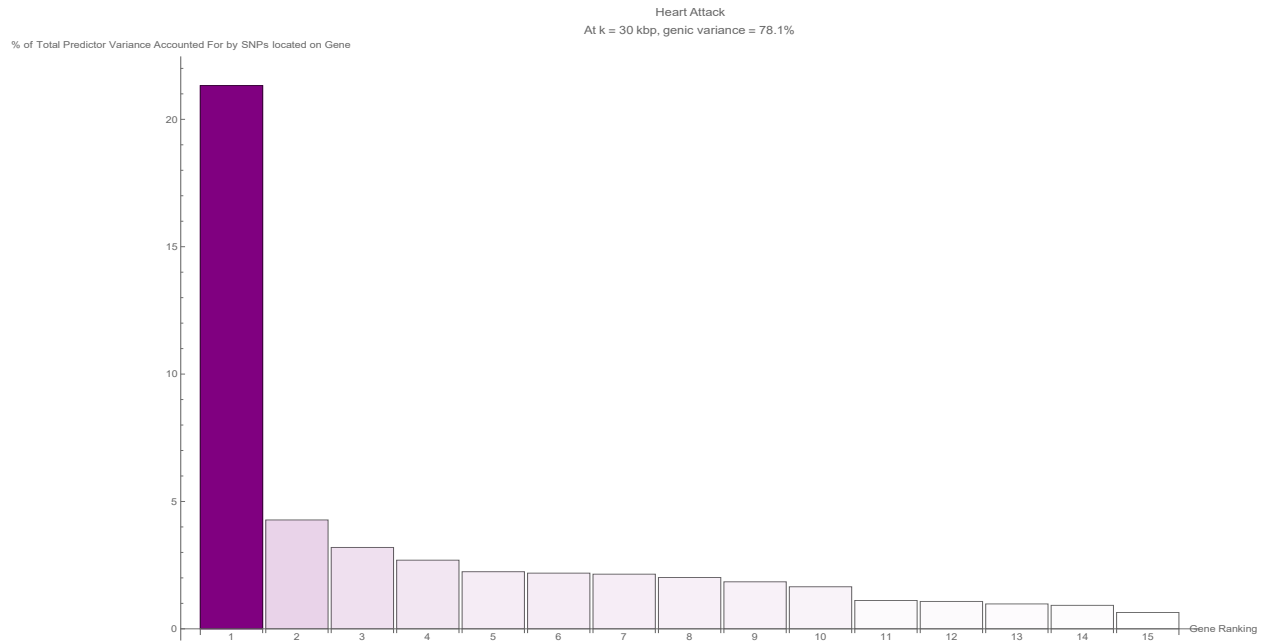

Supplementary Figure S14: *The fifteen largest total values of variance accounted for by predictor SNPs located on a single gene (in terms of the percentage of total variance accounted for by all predictor SNPs) for the heart attack predictor. Each vertical bar is colored violet with a depth of shade proportional to the height of the bar. Here, 'genic' SNPs are contained within the GENCODE Release 19 gene boundaries plus 30 kilo base pairs at both ends.*

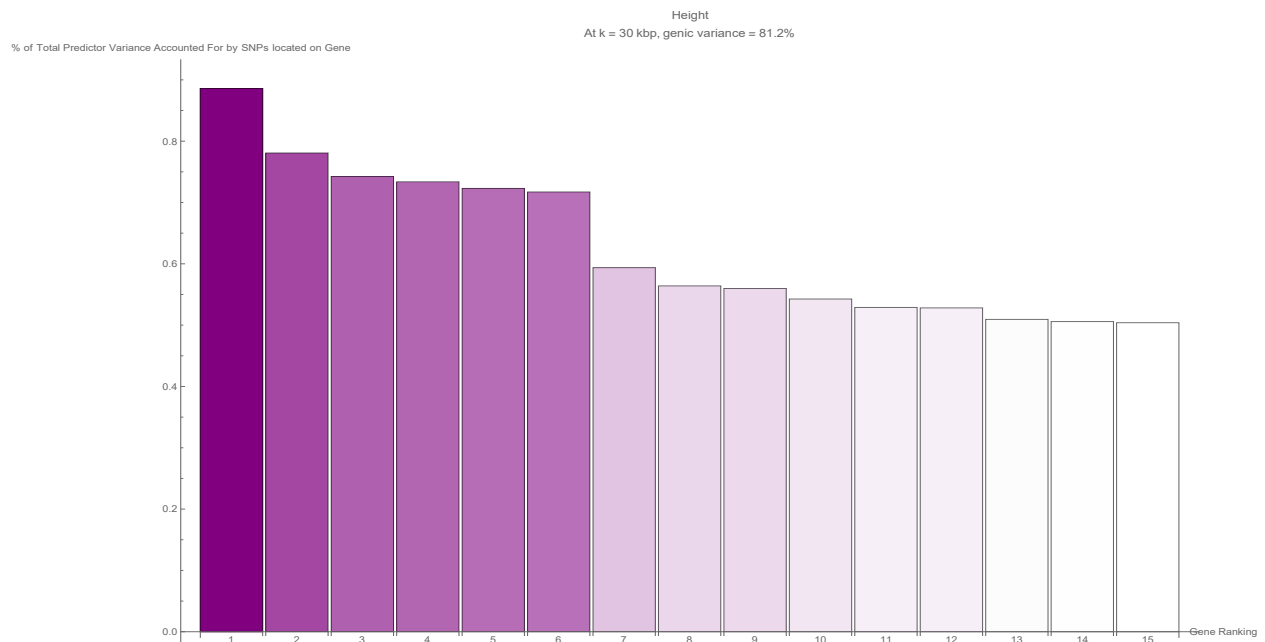

Supplementary Figure S15: *The fifteen largest total values of variance accounted for by predictor SNPs located on a single gene (in terms of the percentage of total variance accounted for by all predictor SNPs) for the height predictor. Each vertical bar is colored violet with a depth of shade proportional to the height of the bar. Here, 'genic' SNPs are contained within the GENCODE Release 19 gene boundaries plus 30 kilo base pairs at both ends.*



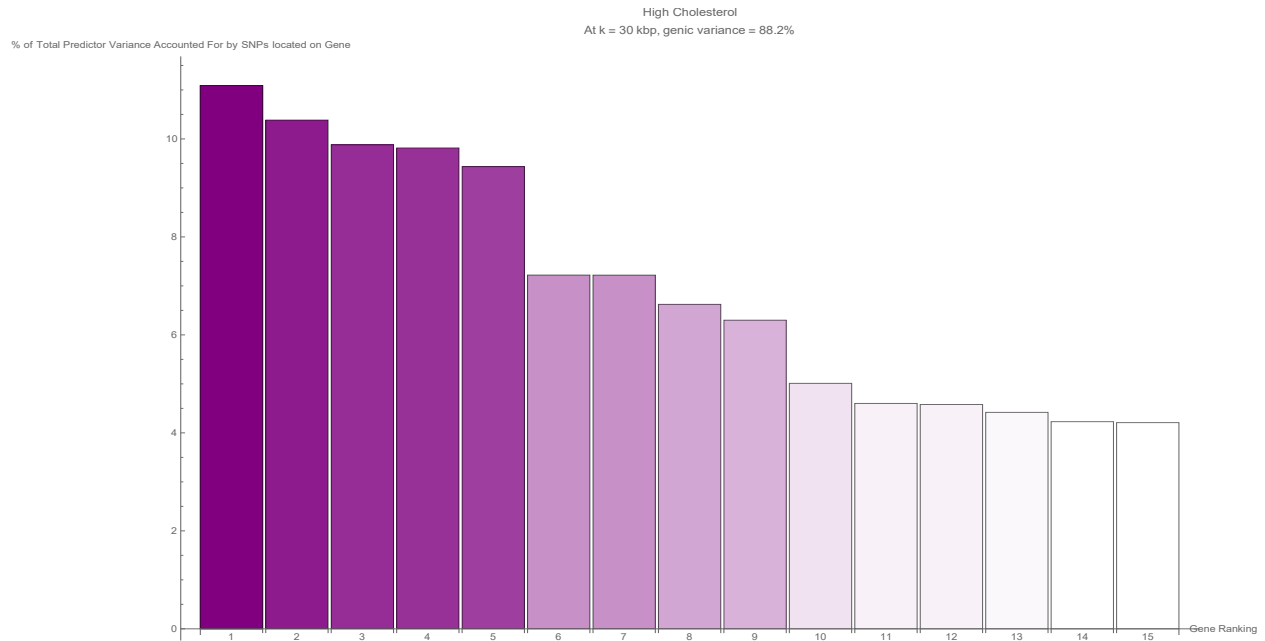

Supplementary Figure S16: *The fifteen largest total values of variance accounted for by predictor SNPs located on a single gene (in terms of the percentage of total variance accounted for by all predictor SNPs) for the high cholesterol predictor. Each vertical bar is colored violet with a depth of shade proportional to the height of the bar. Here, 'genic' SNPs are contained within the GENCODE Release 19 gene boundaries plus 30 kilo base pairs at both ends.*

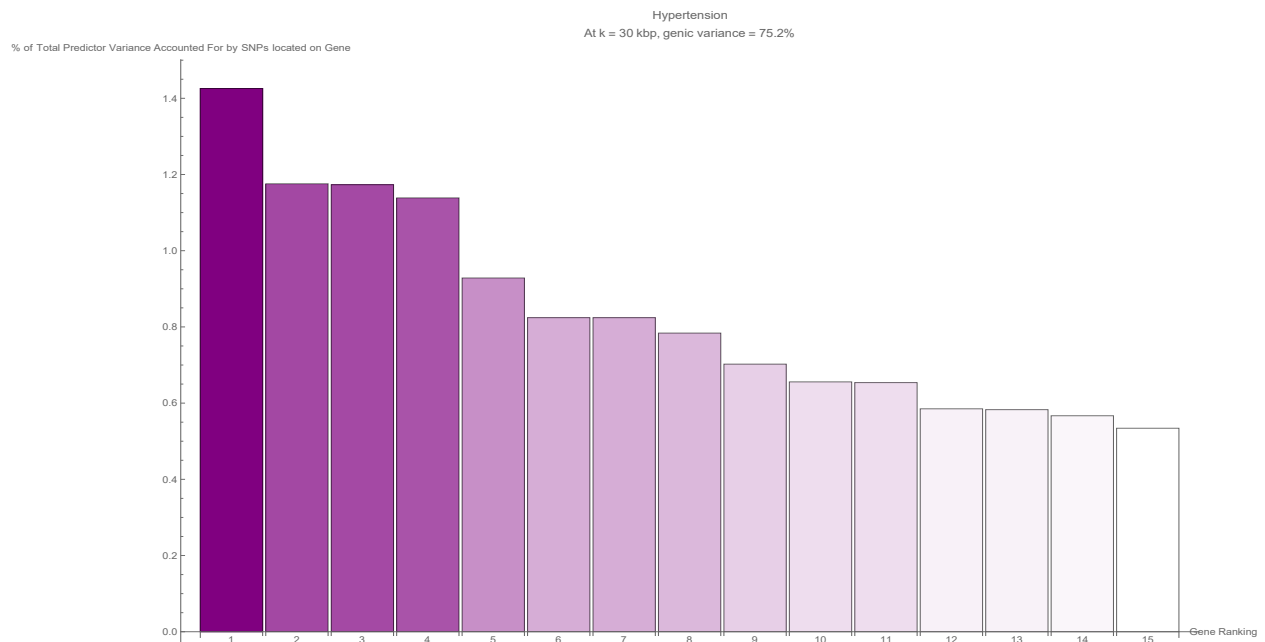

Supplementary Figure S17: *The fifteen largest total values of variance accounted for by predictor SNPs located on a single gene (in terms of the percentage of total variance accounted for by all predictor SNPs) for the hypertension predictor. Each vertical bar is colored violet with a depth of shade proportional to the height of the bar. Here, 'genic' SNPs are contained within the GENCODE Release 19 gene boundaries plus 30 kilo base pairs at both ends.*

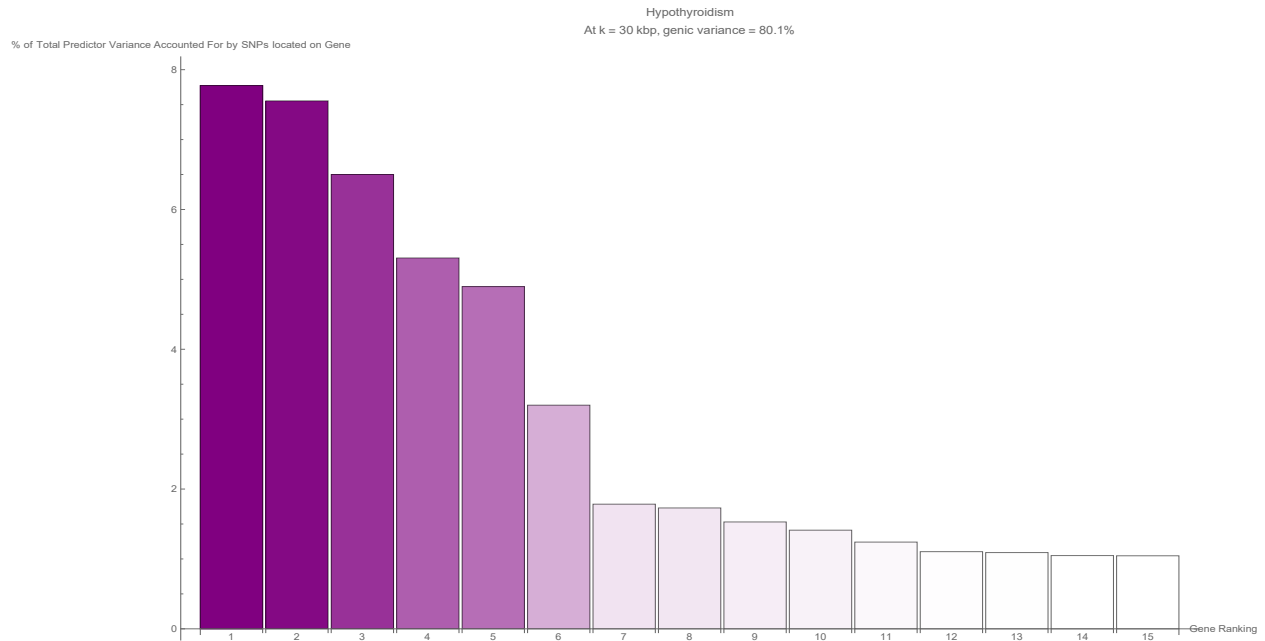

Supplementary Figure S18: *The fifteen largest total values of variance accounted for by predictor SNPs located on a single gene (in terms of the percentage of total variance accounted for by all predictor SNPs) for the hypothyroidism predictor. Each vertical bar is colored violet with a depth of shade proportional to the height of the bar. Here, 'genic' SNPs are contained within the GENCODE Release 19 gene boundaries plus 30 kilo base pairs at both ends.*

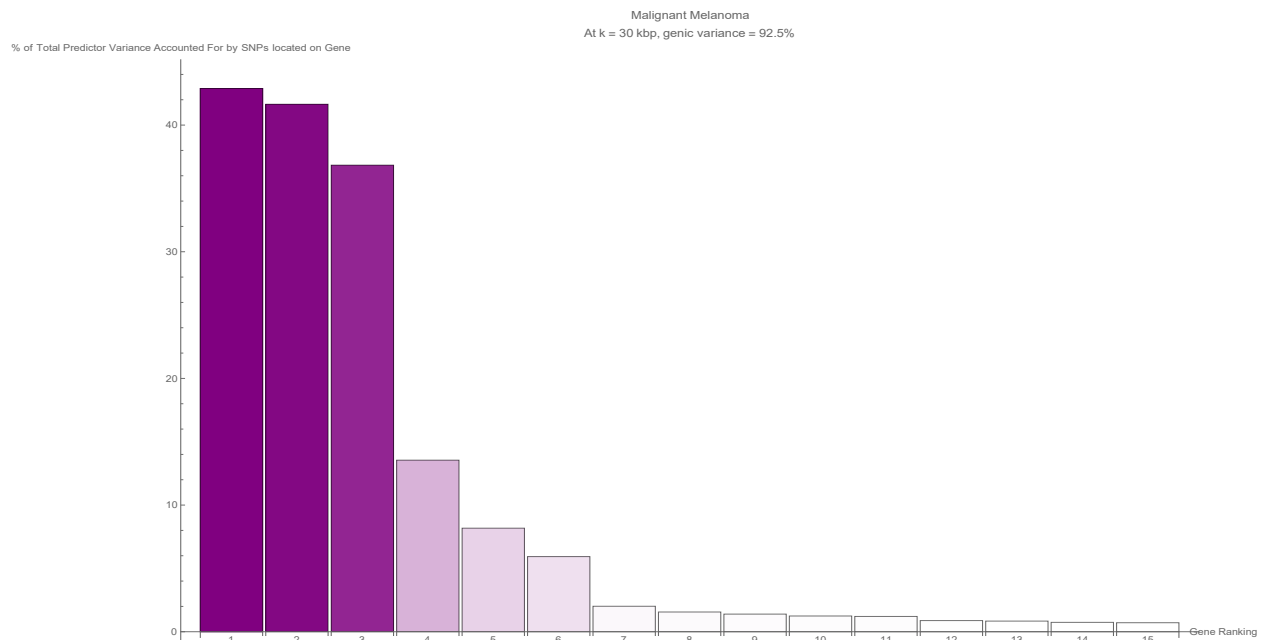

Supplementary Figure S19: *The fifteen largest total values of variance accounted for by predictor SNPs located on a single gene (in terms of the percentage of total variance accounted for by all predictor SNPs) for the malignant melanoma predictor. Each vertical bar is colored violet with a depth of shade proportional to the height of the bar. Here, 'genic' SNPs are contained within the GENCODE Release 19 gene boundaries plus 30 kilo base pairs at both ends.*

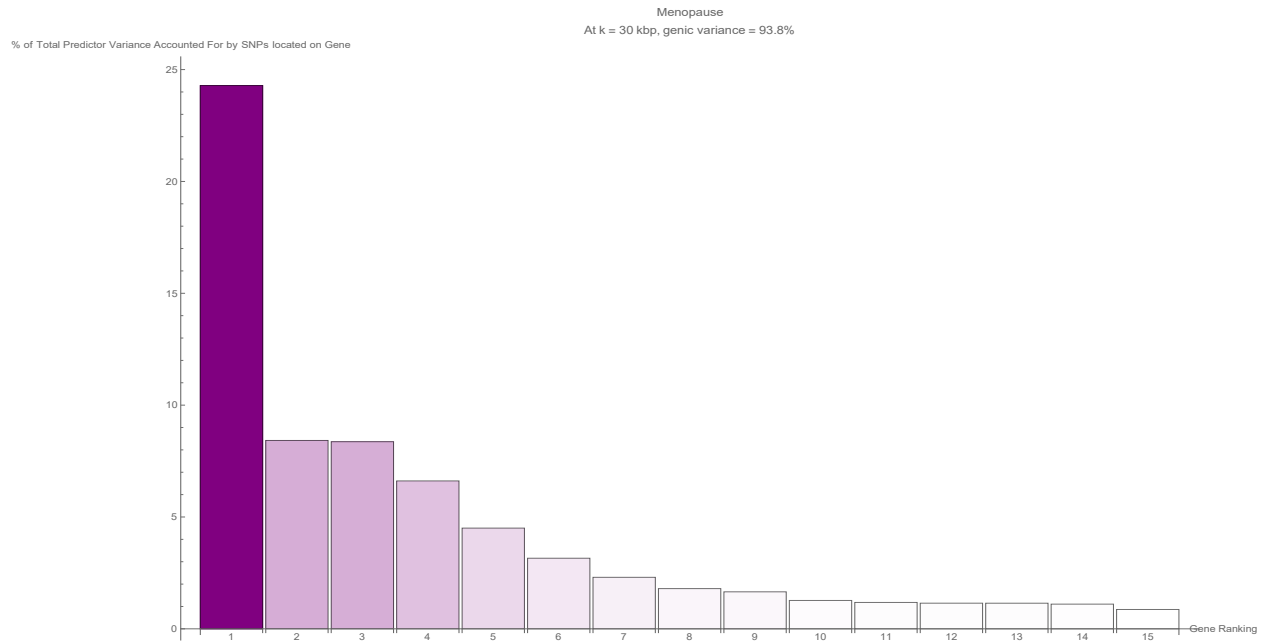

Supplementary Figure S20: *The fifteen largest total values of variance accounted for by predictor SNPs located on a single gene (in terms of the percentage of total variance accounted for by all predictor SNPs) for the menopause predictor. Each vertical bar is colored violet with a depth of shade proportional to the height of the bar. Here, 'genic' SNPs are contained within the GENCODE Release 19 gene boundaries plus 30 kilo base pairs at both ends.*

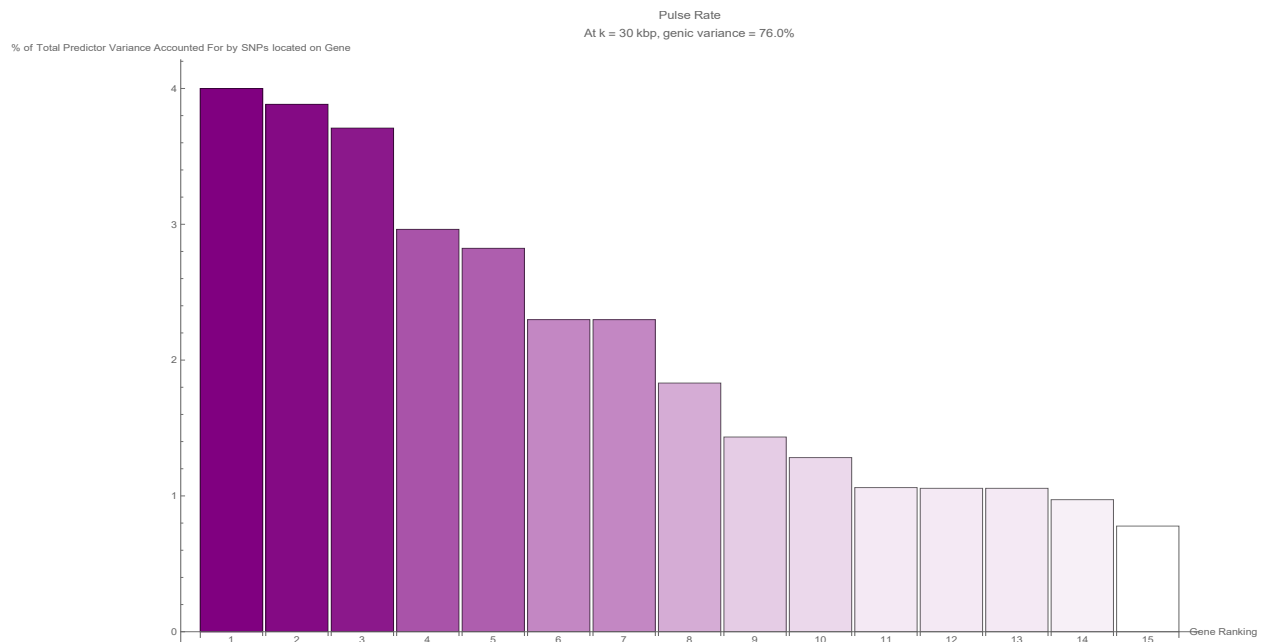

Supplementary Figure S21: *The fifteen largest total values of variance accounted for by predictor SNPs located on a single gene (in terms of the percentage of total variance accounted for by all predictor SNPs) for the pulse rate predictor. Each vertical bar is colored violet with a depth of shade proportional to the height of the bar. Here, 'genic' SNPs are contained within the GENCODE Release 19 gene boundaries plus 30 kilo base pairs at both ends.*

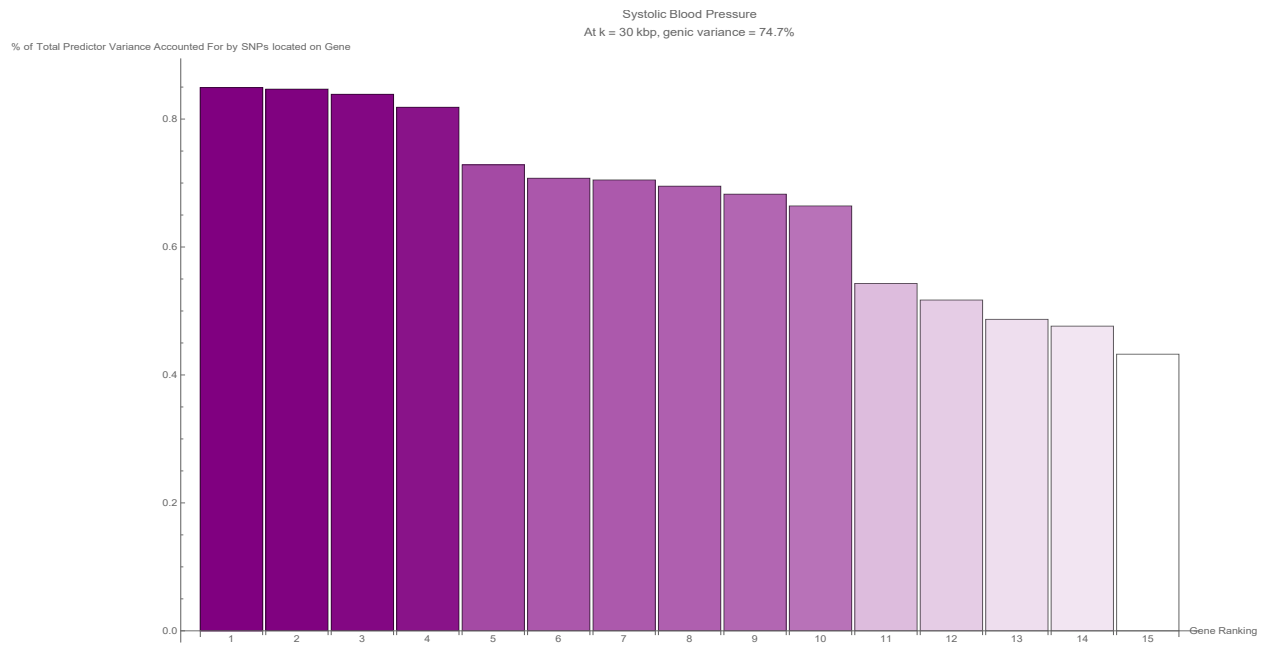

Supplementary Figure S22: *The fifteen largest total values of variance accounted for by predictor SNPs located on a single gene (in terms of the percentage of total variance accounted for by all predictor SNPs) for the systolic blood pressure predictor. Each vertical bar is colored violet with a depth of shade proportional to the height of the bar. Here, 'genic' SNPs are contained within the GENCODE Release 19 gene boundaries plus 30 kilo base pairs at both ends.*

## Appendix B: Supplementary Tables

Tables that list the top genes, as ordered by variance accounted for, for various phenotypes.

Asthma

| Ensembl ID      | Variance Explained by Gene | % of Total Predictor Variance |
|-----------------|----------------------------|-------------------------------|
| ENSG00000196735 | 0.0000461821               | 2.82293                       |
| ENSG00000166949 | 0.0000440566               | 2.69301                       |
| ENSG00000115604 | 0.000039764                | 2.43062                       |
| ENSG00000115602 | 0.0000395971               | 2.42042                       |
| ENSG00000145777 | 0.0000382693               | 2.33925                       |
| ENSG00000134987 | 0.0000382693               | 2.33925                       |
| ENSG00000179344 | 0.0000381038               | 2.32914                       |
| ENSG00000137033 | 0.0000217498               | 1.32948                       |
| ENSG00000038532 | 0.0000207941               | 1.27106                       |
| ENSG00000113522 | 0.0000160743               | 0.982561                      |
| ENSG00000073605 | 0.0000150246               | 0.918398                      |
| ENSG00000172057 | 0.0000150246               | 0.918398                      |
| ENSG00000166888 | 0.0000149384               | 0.913124                      |
| ENSG00000166881 | 0.0000146788               | 0.897259                      |
| ENSG00000166886 | 0.0000146788               | 0.897259                      |
| ENSG00000186075 | 0.0000144062               | 0.880593                      |
| ENSG00000145012 | 0.0000137849               | 0.84262                       |
| ENSG00000158636 | 0.0000137277               | 0.839121                      |

Supplementary Table S23: *For the asthma predictor: list of genes responsible for the top fifteen values of variance accounted for by single genes, and the corresponding variance values, both explicit and expressed as a percentage of the total predictor variance.*

Atrial Fibrillation

| Ensembl ID       | Variance Explained by Gene | % of Total Predictor Variance |
|------------------|----------------------------|-------------------------------|
| ENSG00000140836  | 4.35491 × 10 <sup>-7</sup> | 7.45884                       |
| ENSG00000164093  | 2.86504 × 10 <sup>-7</sup> | 4.90708                       |
| ENSG00000116132  | 1.42571 × 10 <sup>-7</sup> | 2.44188                       |
| ENSG00000143603  | 1.34099 × 10 <sup>-7</sup> | 2.29676                       |
| ENSG00000107954  | 1.16675 × 10 <sup>-7</sup> | 1.99835                       |
| ENSG00000148120  | 1.09383 × 10 <sup>-7</sup> | 1.87345                       |
| ENSG000000089225 | 7.82504 × 10 <sup>-8</sup> | 1.34023                       |
| ENSG00000115935  | 7.60088 × 10 <sup>-8</sup> | 1.30184                       |
| ENSG00000107957  | 6.85145 × 10 <sup>-8</sup> | 1.17348                       |
| ENSG00000105974  | 6.17914 × 10 <sup>-8</sup> | 1.05833                       |
| ENSG00000171385  | 5.7165 × 10 <sup>-8</sup>  | 0.97909                       |
| ENSG00000173406  | 4.58225 × 10 <sup>-8</sup> | 0.784823                      |
| ENSG00000110318  | 1.74445 × 10 <sup>-8</sup> | 0.298779                      |
| ENSG00000120457  | 1.71183 × 10 <sup>-8</sup> | 0.293193                      |
| ENSG00000174370  | 1.71183 × 10 <sup>-8</sup> | 0.293193                      |
| ENSG00000173572  | 1.55386 × 10 <sup>-8</sup> | 0.266137                      |
| ENSG00000179709  | 1.55386 × 10 <sup>-8</sup> | 0.266137                      |

Supplementary Table S24: *For the atrial fibrillation predictor: list of genes responsible for the top fifteen values of variance accounted for by single genes, and the corresponding variance values, both explicit and expressed as a percentage of the total predictor variance.*

Basal Cell Carcinoma

| Ensembl ID      | Variance Explained by Gene | % of Total Predictor Variance |
|-----------------|----------------------------|-------------------------------|
| ENSG00000137265 | 9.11032 × 10 <sup>-7</sup> | 28.4835                       |
| ENSG00000125780 | 3.86761 × 10 <sup>-7</sup> | 12.0921                       |
| ENSG00000140995 | 2.19694 × 10 <sup>-7</sup> | 6.86874                       |
| ENSG00000177946 | 2.19118 × 10 <sup>-7</sup> | 6.85076                       |
| ENSG00000003249 | 2.13993 × 10 <sup>-7</sup> | 6.69052                       |
| ENSG00000179051 | 2.12828 × 10 <sup>-7</sup> | 6.65409                       |
| ENSG00000064012 | 2.10488 × 10 <sup>-7</sup> | 6.58092                       |
| ENSG00000155749 | 2.10488 × 10 <sup>-7</sup> | 6.58092                       |
| ENSG00000003400 | 2.0926 × 10 <sup>-7</sup>  | 6.54255                       |
| ENSG00000114861 | 1.11256 × 10 <sup>-7</sup> | 3.47842                       |
| ENSG00000077498 | 1.04526 × 10 <sup>-7</sup> | 3.26803                       |
| ENSG00000205420 | 1.01298 × 10 <sup>-7</sup> | 3.16709                       |
| ENSG00000186081 | 1.01298 × 10 <sup>-7</sup> | 3.16709                       |
| ENSG00000268716 | 1.01298 × 10 <sup>-7</sup> | 3.16709                       |
| ENSG00000139648 | 9.16756 × 10 <sup>-8</sup> | 2.86625                       |
| ENSG00000158805 | 8.50283 × 10 <sup>-8</sup> | 2.65842                       |
| ENSG00000187741 | 8.50283 × 10 <sup>-8</sup> | 2.65842                       |
| ENSG00000101460 | 7.16043 × 10 <sup>-8</sup> | 2.23872                       |
| ENSG00000101464 | 7.16043 × 10 <sup>-8</sup> | 2.23872                       |
| ENSG00000196735 | 7.01145 × 10 <sup>-8</sup> | 2.19214                       |

Supplementary Table S25: *For the basal cell carcinoma predictor: list of genes responsible for the top fifteen values of variance accounted for by single genes, and the corresponding variance values, both explicit and expressed as a percentage of the total predictor variance.*

Breast Cancer

| Ensembl ID      | Variance Explained by Gene | % of Total Predictor Variance |
|-----------------|----------------------------|-------------------------------|
| ENSG00000066468 | 0.0000212362               | 14.7834                       |
| ENSG00000103460 | 0.0000200173               | 13.9349                       |
| ENSG00000196588 | 2.17644 × 10 <sup>-6</sup> | 1.51512                       |
| ENSG00000120262 | 2.06537 × 10 <sup>-6</sup> | 1.43779                       |
| ENSG00000163491 | 1.96784 × 10 <sup>-6</sup> | 1.3699                        |
| ENSG00000074527 | 1.9048 × 10 <sup>-6</sup>  | 1.32601                       |
| ENSG00000164362 | 1.66297 × 10 <sup>-6</sup> | 1.15766                       |
| ENSG00000140718 | 1.49019 × 10 <sup>-6</sup> | 1.03739                       |
| ENSG00000108175 | 1.45587 × 10 <sup>-6</sup> | 1.01349                       |
| ENSG00000166446 | 1.29111 × 10 <sup>-6</sup> | 0.898797                      |
| ENSG00000049656 | 1.26148 × 10 <sup>-6</sup> | 0.878169                      |
| ENSG00000138311 | 7.52238 × 10 <sup>-7</sup> | 0.523666                      |
| ENSG00000071967 | 6.70661 × 10 <sup>-7</sup> | 0.466876                      |
| ENSG00000167081 | 6.5404 × 10 <sup>-7</sup>  | 0.455306                      |
| ENSG00000136267 | 6.13165 × 10 <sup>-7</sup> | 0.426851                      |

Supplementary Table S26: *For the breast cancer predictor: list of genes responsible for the top fifteen values of variance accounted for by single genes, and the corresponding variance values, both explicit and expressed as a percentage of the total predictor variance.*

Coronary Artery Disease

| Ensembl ID      | Variance Explained by Gene | % of Total Predictor Variance |
|-----------------|----------------------------|-------------------------------|
| ENSG00000198670 | 0.000204929                | 8.14914                       |
| ENSG00000112137 | 0.000154524                | 6.14475                       |
| ENSG00000122194 | 0.000115362                | 4.58747                       |
| ENSG00000146477 | 0.0000584146               | 2.3229                        |
| ENSG00000143126 | 0.000056525                | 2.24775                       |
| ENSG00000134222 | 0.0000565249               | 2.24775                       |
| ENSG00000221986 | 0.0000565246               | 2.24774                       |
| ENSG00000091732 | 0.000022669                | 0.901448                      |
| ENSG00000130203 | 0.0000203651               | 0.809834                      |
| ENSG00000130204 | 0.0000203646               | 0.809811                      |
| ENSG00000181652 | 0.0000170687               | 0.678747                      |
| ENSG00000164867 | 0.0000170686               | 0.678746                      |
| ENSG00000055118 | 0.0000170678               | 0.678713                      |
| ENSG00000134871 | 0.0000158485               | 0.630227                      |
| ENSG00000130208 | 0.0000151627               | 0.602955                      |

Supplementary Table S27: For the coronary artery disease predictor: list of genes responsible for the top fifteen values of variance accounted for by single genes, and the corresponding variance values, both explicit and expressed as a percentage of the total predictor variance.

Diabetes - Type 2

| Ensembl ID      | Variance Explained by Gene | % of Total Predictor Variance |
|-----------------|----------------------------|-------------------------------|
| ENSG00000148737 | 0.000449243                | 24.795                        |
| ENSG00000073792 | $6.41139 \times 10^{-6}$   | 3.53863                       |
| ENSG00000053918 | $3.32273 \times 10^{-6}$   | 1.83391                       |
| ENSG00000145996 | $2.75949 \times 10^{-6}$   | 1.52304                       |
| ENSG00000145730 | $1.68939 \times 10^{-6}$   | 0.932423                      |
| ENSG00000173175 | $1.50627 \times 10^{-6}$   | 0.831356                      |
| ENSG00000115970 | $1.40593 \times 10^{-6}$   | 0.775975                      |
| ENSG00000164756 | $1.38849 \times 10^{-6}$   | 0.766351                      |
| ENSG00000029534 | $1.36035 \times 10^{-6}$   | 0.750819                      |
| ENSG00000165066 | $1.36035 \times 10^{-6}$   | 0.750815                      |
| ENSG00000196781 | $1.29152 \times 10^{-6}$   | 0.712827                      |
| ENSG00000138002 | $1.27887 \times 10^{-6}$   | 0.705844                      |
| ENSG00000115226 | $1.27887 \times 10^{-6}$   | 0.705844                      |
| ENSG00000084734 | $1.27887 \times 10^{-6}$   | 0.705844                      |
| ENSG00000233438 | $1.27887 \times 10^{-6}$   | 0.705844                      |
| ENSG00000152804 | $1.27043 \times 10^{-6}$   | 0.70119                       |
| ENSG00000108175 | $1.24929 \times 10^{-6}$   | 0.689518                      |
| ENSG00000149948 | $1.20786 \times 10^{-6}$   | 0.666652                      |

Supplementary Table S29: For the type-2 diabetes predictor: list of genes responsible for the top fifteen values of variance accounted for by single genes, and the corresponding variance values, both explicit and expressed as a percentage of the total predictor variance.

Diabetes - Type 1

| Ensembl ID      | Variance Explained by Gene | % of Total Predictor Variance |
|-----------------|----------------------------|-------------------------------|
| ENSG00000196735 | $1.71762 \times 10^{-6}$   | 14.2359                       |
| ENSG00000196126 | $1.10313 \times 10^{-6}$   | 9.14287                       |
| ENSG00000179344 | $8.43201 \times 10^{-7}$   | 6.98856                       |
| ENSG00000204290 | $5.28293 \times 10^{-7}$   | 4.37856                       |
| ENSG00000116793 | $4.17049 \times 10^{-7}$   | 3.45655                       |
| ENSG00000081019 | $4.17049 \times 10^{-7}$   | 3.45655                       |
| ENSG00000129965 | $3.03197 \times 10^{-7}$   | 2.51294                       |
| ENSG00000254647 | $3.03197 \times 10^{-7}$   | 2.51294                       |
| ENSG00000180176 | $3.03197 \times 10^{-7}$   | 2.51294                       |
| ENSG00000167244 | $2.96451 \times 10^{-7}$   | 2.45702                       |
| ENSG00000237541 | $2.85331 \times 10^{-7}$   | 2.36486                       |
| ENSG00000204287 | $2.25475 \times 10^{-7}$   | 1.86877                       |
| ENSG00000148737 | $1.82298 \times 10^{-7}$   | 1.51091                       |
| ENSG00000232629 | $1.80438 \times 10^{-7}$   | 1.49549                       |
| ENSG00000204536 | $1.11524 \times 10^{-7}$   | 0.924323                      |
| ENSG00000137310 | $1.11524 \times 10^{-7}$   | 0.924323                      |
| ENSG00000204531 | $1.11524 \times 10^{-7}$   | 0.924323                      |
| ENSG00000206344 | $1.11524 \times 10^{-7}$   | 0.924323                      |
| ENSG00000204392 | $1.04034 \times 10^{-7}$   | 0.862246                      |
| ENSG00000204390 | $9.68184 \times 10^{-8}$   | 0.802444                      |
| ENSG00000204389 | $9.68184 \times 10^{-8}$   | 0.802444                      |
| ENSG00000204388 | $9.68184 \times 10^{-8}$   | 0.802444                      |
| ENSG00000204387 | $9.68184 \times 10^{-8}$   | 0.802444                      |
| ENSG00000204386 | $9.68184 \times 10^{-8}$   | 0.802444                      |
| ENSG00000204252 | $8.09372 \times 10^{-8}$   | 0.670819                      |

Supplementary Table S28: For the type-1 diabetes predictor: list of genes responsible for the top fifteen values of variance accounted for by single genes, and the corresponding variance values, both explicit and expressed as a percentage of the total predictor variance.

Diastolic Blood Pressure

| Ensembl ID      | Variance Explained by Gene | % of Total Predictor Variance |
|-----------------|----------------------------|-------------------------------|
| ENSG00000205517 | 0.00026354                 | 0.802109                      |
| ENSG00000111252 | 0.00026058                 | 0.793101                      |
| ENSG00000204842 | 0.000260509                | 0.792884                      |
| ENSG00000198003 | 0.000259275                | 0.789127                      |
| ENSG00000130175 | 0.000246709                | 0.750883                      |
| ENSG00000168038 | 0.000239419                | 0.728695                      |
| ENSG00000123454 | 0.00021092                 | 0.641956                      |
| ENSG00000123453 | 0.000209687                | 0.638203                      |
| ENSG00000138821 | 0.000181787                | 0.553286                      |
| ENSG00000138675 | 0.000177214                | 0.539366                      |
| ENSG00000177000 | 0.000170691                | 0.519515                      |
| ENSG00000118021 | 0.000170045                | 0.517549                      |
| ENSG00000165995 | 0.000169235                | 0.515084                      |
| ENSG00000215910 | 0.000166846                | 0.507812                      |
| ENSG00000182511 | 0.000162822                | 0.495565                      |

Supplementary Table S30: For the diastolic blood pressure predictor: list of genes responsible for the top fifteen values of variance accounted for by single genes, and the corresponding variance values, both explicit and expressed as a percentage of the total predictor variance.

| Education Years |                            |                               |
|-----------------|----------------------------|-------------------------------|
| Ensembl ID      | Variance Explained by Gene | % of Total Predictor Variance |
| ENSG00000140945 | 0.000117975                | 0.234252                      |
| ENSG00000101489 | 0.000103631                | 0.20577                       |
| ENSG00000153310 | 0.0000979671               | 0.194524                      |
| ENSG00000179915 | 0.000093737                | 0.186125                      |
| ENSG00000145934 | 0.0000880685               | 0.174869                      |
| ENSG00000108684 | 0.000079856                | 0.158563                      |
| ENSG00000078328 | 0.0000798313               | 0.158514                      |
| ENSG00000119866 | 0.0000769443               | 0.152781                      |
| ENSG00000164061 | 0.0000741843               | 0.147301                      |
| ENSG00000188580 | 0.0000732577               | 0.145461                      |
| ENSG00000101109 | 0.000071637                | 0.142243                      |
| ENSG00000168702 | 0.0000694311               | 0.137863                      |
| ENSG00000075884 | 0.000068552                | 0.136117                      |
| ENSG00000183715 | 0.0000669065               | 0.13285                       |
| ENSG00000176171 | 0.0000657761               | 0.130606                      |

Supplementary Table S31: For the education years predictor: list of genes responsible for the top fifteen values of variance accounted for by single genes, and the corresponding variance values, both explicit and expressed as a percentage of the total predictor variance.

| Glaucoma        |                            |                               |
|-----------------|----------------------------|-------------------------------|
| Ensembl ID      | Variance Explained by Gene | % of Total Predictor Variance |
| ENSG00000143149 | $1.91058 \times 10^{-6}$   | 19.1727                       |
| ENSG00000143183 | $1.91058 \times 10^{-6}$   | 19.1727                       |
| ENSG00000007237 | $4.46775 \times 10^{-7}$   | 4.4834                        |
| ENSG00000264194 | $4.38653 \times 10^{-7}$   | 4.4019                        |
| ENSG00000196526 | $3.18499 \times 10^{-7}$   | 3.19614                       |
| ENSG00000264545 | $2.11973 \times 10^{-7}$   | 2.12716                       |
| ENSG00000136944 | $1.45785 \times 10^{-7}$   | 1.46296                       |
| ENSG00000077044 | $1.33192 \times 10^{-7}$   | 1.33658                       |
| ENSG00000179008 | $1.19163 \times 10^{-7}$   | 1.1958                        |
| ENSG00000184302 | $1.19163 \times 10^{-7}$   | 1.1958                        |
| ENSG00000171435 | $1.09544 \times 10^{-7}$   | 1.09927                       |
| ENSG00000147883 | $1.03397 \times 10^{-7}$   | 1.0376                        |
| ENSG00000157110 | $9.30046 \times 10^{-8}$   | 0.933304                      |
| ENSG00000183044 | $7.686 \times 10^{-8}$     | 0.771292                      |
| ENSG00000115970 | $7.37166 \times 10^{-8}$   | 0.739748                      |
| ENSG00000138193 | $7.18263 \times 10^{-8}$   | 0.720779                      |
| ENSG00000112685 | $6.58665 \times 10^{-8}$   | 0.660972                      |

Supplementary Table S33: For the glaucoma predictor: list of genes responsible for the top fifteen values of variance accounted for by single genes, and the corresponding variance values, both explicit and expressed as a percentage of the total predictor variance.

| Gallstones      |                            |                               |
|-----------------|----------------------------|-------------------------------|
| Ensembl ID      | Variance Explained by Gene | % of Total Predictor Variance |
| ENSG00000143921 | 0.0000278316               | 83.2315                       |
| ENSG00000138075 | 0.000026955                | 82.8245                       |
| ENSG00000138036 | 0.0000268878               | 80.4092                       |
| ENSG00000152527 | $6.84056 \times 10^{-7}$   | 2.0457                        |
| ENSG00000197249 | $5.88871 \times 10^{-7}$   | 1.76105                       |
| ENSG00000105398 | $5.81249 \times 10^{-7}$   | 1.73825                       |
| ENSG00000198589 | $5.33802 \times 10^{-7}$   | 1.59636                       |
| ENSG00000170390 | $5.3318 \times 10^{-7}$    | 1.5945                        |
| ENSG00000101076 | $4.42043 \times 10^{-7}$   | 1.32195                       |
| ENSG00000005471 | $3.63638 \times 10^{-7}$   | 1.08748                       |
| ENSG00000169903 | $3.58726 \times 10^{-7}$   | 1.07279                       |
| ENSG00000085563 | $3.49533 \times 10^{-7}$   | 1.0453                        |
| ENSG00000176920 | $2.11116 \times 10^{-7}$   | 0.631352                      |
| ENSG00000176909 | $2.11116 \times 10^{-7}$   | 0.631352                      |
| ENSG00000105538 | $2.11116 \times 10^{-7}$   | 0.631352                      |
| ENSG00000182264 | $2.11116 \times 10^{-7}$   | 0.631352                      |
| ENSG00000215114 | $1.42874 \times 10^{-7}$   | 0.427272                      |
| ENSG00000167910 | $1.37481 \times 10^{-7}$   | 0.411142                      |

Supplementary Table S32: For the gallstones predictor: list of genes responsible for the top fifteen values of variance accounted for by single genes, and the corresponding variance values, both explicit and expressed as a percentage of the total predictor variance.

| Gout             |                            |                               |
|------------------|----------------------------|-------------------------------|
| Ensembl ID       | Variance Explained by Gene | % of Total Predictor Variance |
| ENSG00000118777  | 0.0000202008               | 56.9739                       |
| ENSG00000109667  | $4.39332 \times 10^{-6}$   | 12.3908                       |
| ENSG00000138002  | $1.25013 \times 10^{-6}$   | 3.52582                       |
| ENSG00000115226  | $1.25013 \times 10^{-6}$   | 3.52582                       |
| ENSG000000084734 | $1.25013 \times 10^{-6}$   | 3.52582                       |
| ENSG00000196616  | $1.23783 \times 10^{-6}$   | 3.49115                       |
| ENSG00000248144  | $1.23783 \times 10^{-6}$   | 3.49115                       |
| ENSG00000187758  | $1.23775 \times 10^{-6}$   | 3.49093                       |
| ENSG00000233438  | $1.2312 \times 10^{-6}$    | 3.47244                       |
| ENSG00000124568  | $1.04791 \times 10^{-6}$   | 2.9555                        |
| ENSG00000124564  | $1.04791 \times 10^{-6}$   | 2.9555                        |
| ENSG00000168065  | $1.02306 \times 10^{-6}$   | 2.88542                       |
| ENSG00000197891  | $9.27473 \times 10^{-7}$   | 2.61582                       |
| ENSG00000265491  | $4.92238 \times 10^{-7}$   | 1.3883                        |
| ENSG00000174827  | $4.72186 \times 10^{-7}$   | 1.33174                       |
| ENSG00000117281  | $4.72186 \times 10^{-7}$   | 1.33174                       |
| ENSG00000165449  | $3.68976 \times 10^{-7}$   | 1.04065                       |
| ENSG00000110076  | $3.15776 \times 10^{-7}$   | 0.890607                      |
| ENSG00000179912  | $2.86978 \times 10^{-7}$   | 0.809385                      |
| ENSG00000163935  | $2.22875 \times 10^{-7}$   | 0.62859                       |
| ENSG00000272305  | $2.22875 \times 10^{-7}$   | 0.62859                       |

Supplementary Table S34: For the gout predictor: list of genes responsible for the top fifteen values of variance accounted for by single genes, and the corresponding variance values, both explicit and expressed as a percentage of the total predictor variance.

Heart Attack

| Ensembl ID      | Variance Explained by Gene | % of Total Predictor Variance |
|-----------------|----------------------------|-------------------------------|
| ENSG00000198670 | 6.52514 × 10 <sup>-6</sup> | 21.325                        |
| ENSG00000154305 | 1.30816 × 10 <sup>-6</sup> | 4.27522                       |
| ENSG00000186063 | 1.30816 × 10 <sup>-6</sup> | 4.27522                       |
| ENSG00000112137 | 9.77669 × 10 <sup>-7</sup> | 3.19514                       |
| ENSG00000143126 | 8.24884 × 10 <sup>-7</sup> | 2.69582                       |
| ENSG00000134222 | 8.24884 × 10 <sup>-7</sup> | 2.69582                       |
| ENSG00000221986 | 8.24884 × 10 <sup>-7</sup> | 2.69582                       |
| ENSG00000130204 | 6.85983 × 10 <sup>-7</sup> | 2.24188                       |
| ENSG00000130203 | 6.85983 × 10 <sup>-7</sup> | 2.24188                       |
| ENSG00000130208 | 6.85983 × 10 <sup>-7</sup> | 2.24188                       |
| ENSG00000267467 | 6.69128 × 10 <sup>-7</sup> | 2.18679                       |
| ENSG00000224916 | 6.69128 × 10 <sup>-7</sup> | 2.18679                       |
| ENSG00000118526 | 6.56704 × 10 <sup>-7</sup> | 2.14619                       |
| ENSG00000130164 | 6.16851 × 10 <sup>-7</sup> | 2.01594                       |
| ENSG00000127616 | 5.64743 × 10 <sup>-7</sup> | 1.84565                       |
| ENSG00000234906 | 5.05309 × 10 <sup>-7</sup> | 1.65141                       |
| ENSG00000187498 | 3.40483 × 10 <sup>-7</sup> | 1.11274                       |
| ENSG00000091732 | 3.29055 × 10 <sup>-7</sup> | 1.07539                       |
| ENSG00000111252 | 2.99308 × 10 <sup>-7</sup> | 0.978174                      |
| ENSG00000204842 | 2.99308 × 10 <sup>-7</sup> | 0.978174                      |
| ENSG00000115970 | 2.8221 × 10 <sup>-7</sup>  | 0.922297                      |
| ENSG00000112531 | 1.96104 × 10 <sup>-7</sup> | 0.640892                      |

Supplementary Table S35: For the heart attack predictor: list of genes responsible for the top fifteen values of variance accounted for by single genes, and the corresponding variance values, both explicit and expressed as a percentage of the total predictor variance.

Height

| Ensembl ID      | Variance Explained by Gene | % of Total Predictor Variance |
|-----------------|----------------------------|-------------------------------|
| ENSG00000140470 | 0.00202515                 | 0.885937                      |
| ENSG00000157766 | 0.00178485                 | 0.780812                      |
| ENSG00000116183 | 0.00169709                 | 0.742421                      |
| ENSG00000126001 | 0.0016775                  | 0.733849                      |
| ENSG00000101019 | 0.00165261                 | 0.722961                      |
| ENSG00000204183 | 0.00163949                 | 0.717221                      |
| ENSG00000125965 | 0.00163949                 | 0.717221                      |
| ENSG00000156218 | 0.00135713                 | 0.593697                      |
| ENSG00000164161 | 0.0012893                  | 0.564027                      |
| ENSG00000140443 | 0.00127966                 | 0.559809                      |
| ENSG00000140511 | 0.00124035                 | 0.54261                       |
| ENSG00000172201 | 0.00120895                 | 0.528875                      |
| ENSG00000144535 | 0.00120723                 | 0.52812                       |
| ENSG00000066827 | 0.00116436                 | 0.509369                      |
| ENSG00000115380 | 0.00115624                 | 0.505814                      |
| ENSG00000176124 | 0.00115192                 | 0.503927                      |

Supplementary Table S36: For the height predictor: list of genes responsible for the top fifteen values of variance accounted for by single genes, and the corresponding variance values, both explicit and expressed as a percentage of the total predictor variance.

High Cholesterol

| Ensembl ID      | Variance Explained by Gene | % of Total Predictor Variance |
|-----------------|----------------------------|-------------------------------|
| ENSG00000130164 | 0.000159927                | 11.0888                       |
| ENSG00000130208 | 0.00014979                 | 10.3859                       |
| ENSG00000130204 | 0.000142489                | 9.87962                       |
| ENSG00000130203 | 0.000141593                | 9.81752                       |
| ENSG00000127616 | 0.00013607                 | 9.43459                       |
| ENSG00000221986 | 0.000104152                | 7.22154                       |
| ENSG00000143126 | 0.000104132                | 7.22014                       |
| ENSG00000134222 | 0.000104132                | 7.22014                       |
| ENSG00000267467 | 0.000095527                | 6.62348                       |
| ENSG00000224916 | 0.000095527                | 6.62348                       |
| ENSG00000130202 | 0.0000908673               | 6.3004                        |
| ENSG00000084674 | 0.0000722735               | 5.01117                       |
| ENSG00000137656 | 0.0000663571               | 4.60095                       |
| ENSG00000109917 | 0.0000660421               | 4.57911                       |
| ENSG00000110243 | 0.0000660421               | 4.57911                       |
| ENSG00000169174 | 0.0000637275               | 4.41863                       |
| ENSG00000162402 | 0.0000609838               | 4.22839                       |
| ENSG00000162399 | 0.000060702                | 4.20885                       |

Supplementary Table S37: For the high cholesterol predictor: list of genes responsible for the top fifteen values of variance accounted for by single genes, and the corresponding variance values, both explicit and expressed as a percentage of the total predictor variance.

Hypertension

| Ensembl ID      | Variance Explained by Gene | % of Total Predictor Variance |
|-----------------|----------------------------|-------------------------------|
| ENSG00000138675 | 0.0000739221               | 1.42576                       |
| ENSG00000205517 | 0.0000609586               | 1.17573                       |
| ENSG00000198003 | 0.0000608256               | 1.17317                       |
| ENSG00000130175 | 0.0000590379               | 1.13869                       |
| ENSG00000171105 | 0.000048139                | 0.928475                      |
| ENSG00000111252 | 0.000042734                | 0.824227                      |
| ENSG00000204842 | 0.0000427337               | 0.824221                      |
| ENSG00000171303 | 0.000040641                | 0.783858                      |
| ENSG00000183346 | 0.0000364154               | 0.702357                      |
| ENSG00000140564 | 0.0000340002               | 0.655775                      |
| ENSG00000182511 | 0.0000340002               | 0.655775                      |
| ENSG00000196547 | 0.0000338974               | 0.653792                      |
| ENSG00000130592 | 0.000030334                | 0.585063                      |
| ENSG00000130598 | 0.0000302174               | 0.582815                      |
| ENSG00000165995 | 0.0000293892               | 0.56684                       |
| ENSG00000138193 | 0.0000276911               | 0.534089                      |

Supplementary Table S38: For the hypertension predictor: list of genes responsible for the top fifteen values of variance accounted for by single genes, and the corresponding variance values, both explicit and expressed as a percentage of the total predictor variance.



| Hypothyroidism  |                            |                               |
|-----------------|----------------------------|-------------------------------|
| Ensembl ID      | Variance Explained by Gene | % of Total Predictor Variance |
| ENSG00000081019 | 0.0000352729               | 7.77261                       |
| ENSG00000134242 | 0.0000342818               | 7.55422                       |
| ENSG00000111252 | 0.0000295005               | 6.50062                       |
| ENSG00000204842 | 0.0000295005               | 6.50062                       |
| ENSG00000196735 | 0.0000240816               | 5.30654                       |
| ENSG00000179344 | 0.0000222207               | 4.89647                       |
| ENSG00000163599 | 0.0000145232               | 3.20029                       |
| ENSG00000273167 | 8.09495 × 10 <sup>-6</sup> | 1.78378                       |
| ENSG00000182957 | 8.09495 × 10 <sup>-6</sup> | 1.78378                       |
| ENSG00000134215 | 7.84936 × 10 <sup>-6</sup> | 1.72966                       |
| ENSG00000112182 | 6.94025 × 10 <sup>-6</sup> | 1.52933                       |
| ENSG00000204520 | 6.40646 × 10 <sup>-6</sup> | 1.41171                       |
| ENSG00000145012 | 5.63275 × 10 <sup>-6</sup> | 1.24122                       |
| ENSG00000100385 | 5.00989 × 10 <sup>-6</sup> | 1.10396                       |
| ENSG00000138378 | 4.95025 × 10 <sup>-6</sup> | 1.09082                       |
| ENSG00000223865 | 4.75552 × 10 <sup>-6</sup> | 1.04791                       |
| ENSG00000231389 | 4.74254 × 10 <sup>-6</sup> | 1.04505                       |

Supplementary Table S39: For the hypothyroidism predictor: list of genes responsible for the top fifteen values of variance accounted for by single genes, and the corresponding variance values, both explicit and expressed as a percentage of the total predictor variance.

| Menopause       |                            |                               |
|-----------------|----------------------------|-------------------------------|
| Ensembl ID      | Variance Explained by Gene | % of Total Predictor Variance |
| ENSG00000183878 | 0.339579                   | 24.2854                       |
| ENSG00000125885 | 0.117767                   | 8.42228                       |
| ENSG00000089195 | 0.116968                   | 8.3651                        |
| ENSG00000127311 | 0.0924778                  | 6.61366                       |
| ENSG00000160469 | 0.0629791                  | 4.50402                       |
| ENSG00000180061 | 0.0629791                  | 4.50402                       |
| ENSG00000133247 | 0.0629791                  | 4.50402                       |
| ENSG00000160471 | 0.0629791                  | 4.50402                       |
| ENSG00000267531 | 0.0629791                  | 4.50402                       |
| ENSG00000187840 | 0.0441477                  | 3.15727                       |
| ENSG00000163312 | 0.0322135                  | 2.30379                       |
| ENSG00000163319 | 0.0322135                  | 2.30379                       |
| ENSG00000163322 | 0.0322135                  | 2.30379                       |
| ENSG00000087206 | 0.0251368                  | 1.79769                       |
| ENSG00000113761 | 0.023128                   | 1.65403                       |
| ENSG00000196531 | 0.017758                   | 1.26998                       |
| ENSG00000198056 | 0.017758                   | 1.26998                       |
| ENSG0000025423  | 0.017758                   | 1.26998                       |
| ENSG00000151726 | 0.0165154                  | 1.18112                       |
| ENSG00000158315 | 0.0160452                  | 1.14749                       |
| ENSG00000116954 | 0.0160272                  | 1.14621                       |
| ENSG00000214114 | 0.0160272                  | 1.14621                       |
| ENSG00000274944 | 0.0160272                  | 1.14621                       |
| ENSG00000131233 | 0.0160272                  | 1.14621                       |
| ENSG00000155974 | 0.0154474                  | 1.10474                       |
| ENSG00000234719 | 0.0121138                  | 0.866332                      |

Supplementary Table S41: For the menopause predictor: list of genes responsible for the top fifteen values of variance accounted for by single genes, and the corresponding variance values, both explicit and expressed as a percentage of the total predictor variance.

| Malignant Melanoma |                            |                               |
|--------------------|----------------------------|-------------------------------|
| Ensembl ID         | Variance Explained by Gene | % of Total Predictor Variance |
| ENSG00000198211    | 5.68246 × 10 <sup>-7</sup> | 42.8898                       |
| ENSG00000258947    | 5.68246 × 10 <sup>-7</sup> | 42.8898                       |
| ENSG00000141002    | 5.51776 × 10 <sup>-7</sup> | 41.6467                       |
| ENSG00000258839    | 5.51776 × 10 <sup>-7</sup> | 41.6467                       |
| ENSG00000140995    | 4.88084 × 10 <sup>-7</sup> | 36.8394                       |
| ENSG00000077498    | 1.79479 × 10 <sup>-7</sup> | 13.5467                       |
| ENSG00000158805    | 1.08341 × 10 <sup>-7</sup> | 8.17731                       |
| ENSG00000187741    | 1.08341 × 10 <sup>-7</sup> | 8.17731                       |
| ENSG00000164362    | 7.85712 × 10 <sup>-8</sup> | 5.93036                       |
| ENSG00000049656    | 7.85712 × 10 <sup>-8</sup> | 5.93036                       |
| ENSG00000151789    | 2.6662 × 10 <sup>-8</sup>  | 2.01238                       |
| ENSG00000005884    | 2.06455 × 10 <sup>-8</sup> | 1.55827                       |
| ENSG00000005882    | 2.06455 × 10 <sup>-8</sup> | 1.55827                       |
| ENSG00000172292    | 1.84488 × 10 <sup>-8</sup> | 1.39247                       |
| ENSG00000177946    | 1.64698 × 10 <sup>-8</sup> | 1.2431                        |
| ENSG00000101460    | 1.60221 × 10 <sup>-8</sup> | 1.20931                       |
| ENSG00000101464    | 1.60221 × 10 <sup>-8</sup> | 1.20931                       |
| ENSG00000159110    | 1.16468 × 10 <sup>-8</sup> | 0.879072                      |
| ENSG00000249624    | 1.16468 × 10 <sup>-8</sup> | 0.879072                      |
| ENSG00000243646    | 1.16468 × 10 <sup>-8</sup> | 0.879072                      |
| ENSG00000139644    | 1.11346 × 10 <sup>-8</sup> | 0.840415                      |
| ENSG00000145996    | 9.83099 × 10 <sup>-9</sup> | 0.742018                      |
| ENSG00000150995    | 9.41989 × 10 <sup>-9</sup> | 0.71099                       |

Supplementary Table S40: For the malignant melanoma predictor: list of genes responsible for the top fifteen values of variance accounted for by single genes, and the corresponding variance values, both explicit and expressed as a percentage of the total predictor variance.

| Pulse Rate      |                            |                               |
|-----------------|----------------------------|-------------------------------|
| Ensembl ID      | Variance Explained by Gene | % of Total Predictor Variance |
| ENSG00000092054 | 0.0016225                  | 3.9998                        |
| ENSG00000197616 | 0.00157533                 | 3.8835                        |
| ENSG00000163492 | 0.00150449                 | 3.70887                       |
| ENSG00000166091 | 0.00120182                 | 2.96274                       |
| ENSG00000166090 | 0.00114524                 | 2.82326                       |
| ENSG00000155657 | 0.000932079                | 2.29777                       |
| ENSG00000149633 | 0.000932021                | 2.29762                       |
| ENSG00000100842 | 0.000742851                | 1.83128                       |
| ENSG00000196376 | 0.000581659                | 1.43391                       |
| ENSG00000182732 | 0.00052007                 | 1.28208                       |
| ENSG00000165801 | 0.000430485                | 1.06123                       |
| ENSG00000165804 | 0.000430485                | 1.06123                       |
| ENSG00000232070 | 0.000430485                | 1.06123                       |
| ENSG00000165795 | 0.000428352                | 1.05598                       |
| ENSG00000173431 | 0.000428338                | 1.05594                       |
| ENSG00000174059 | 0.000394401                | 0.972278                      |
| ENSG00000089225 | 0.000315557                | 0.777911                      |

Supplementary Table S42: For the pulse rate predictor: list of genes responsible for the top fifteen values of variance accounted for by single genes, and the corresponding variance values, both explicit and expressed as a percentage of the total predictor variance.

Systolic Blood Pressure

| Ensembl ID      | Variance Explained by Gene | % of Total Predictor Variance |
|-----------------|----------------------------|-------------------------------|
| ENSG00000205517 | 0.000244798                | 0.849217                      |
| ENSG00000165995 | 0.000244118                | 0.846856                      |
| ENSG00000198003 | 0.000241788                | 0.838773                      |
| ENSG00000130175 | 0.00023594                 | 0.818486                      |
| ENSG0000011021  | 0.00020999                 | 0.728465                      |
| ENSG00000177000 | 0.000203954                | 0.707526                      |
| ENSG00000215910 | 0.000203195                | 0.704894                      |
| ENSG00000070961 | 0.000200379                | 0.695125                      |
| ENSG00000171105 | 0.000196777                | 0.682628                      |
| ENSG00000138675 | 0.00019149                 | 0.664289                      |
| ENSG00000198373 | 0.000156504                | 0.54292                       |
| ENSG00000157322 | 0.000156504                | 0.54292                       |
| ENSG00000138193 | 0.00014907                 | 0.517132                      |
| ENSG00000196547 | 0.000140354                | 0.486896                      |
| ENSG00000165895 | 0.000137298                | 0.476292                      |
| ENSG00000065054 | 0.000124649                | 0.432413                      |

Supplementary Table S43: *For the systolic blood pressure predictor: list of genes responsible for the top fifteen values of variance accounted for by single genes, and the corresponding variance values, both explicit and expressed as a percentage of the total predictor variance.*

Malignant Melanoma SNPs on AC092143.1, TUBB3, TCF25, DEF8

| SNP ID        | Variance Explained by SNP | % of Total Predictor Variance |
|---------------|---------------------------|-------------------------------|
| Affx-35293625 | $4.57025 \times 10^{-7}$  | 34.4951                       |
| rs11538871    | $8.01617 \times 10^{-8}$  | 6.0504                        |
| rs8063761     | $1.52938 \times 10^{-8}$  | 1.15434                       |
| rs1805008     | $7.82105 \times 10^{-9}$  | 0.590314                      |
| rs11547464    | $4.99642 \times 10^{-9}$  | 0.377118                      |
| rs1805009     | $1.77245 \times 10^{-9}$  | 0.13378                       |
| rs8049897     | $1.12683 \times 10^{-9}$  | 0.0850505                     |
| rs117204628   | $4.91714 \times 10^{-11}$ | 0.00371134                    |

Supplementary Table S46: *For the malignant melanoma predictor: list of SNPs located on the novel AC092143.1, TUBB3, TCF25, and DEF8 genes, and the corresponding variance values, both explicit and expressed as a percentage of the total predictor variance.*

Menopause SNPs on UTY

| SNP ID    | Variance Explained by SNP | % of Total Predictor Variance |
|-----------|---------------------------|-------------------------------|
| rs1236440 | 0.339579                  | 24.2854                       |

Supplementary Table S47: *For the menopause predictor: list of SNPs located on the novel UTY gene, and the corresponding variance values, both explicit and expressed as a percentage of the total predictor variance.*

Gallstones SNPs on DYNC2L1

| SNP ID         | Variance Explained by SNP | % of Total Predictor Variance |
|----------------|---------------------------|-------------------------------|
| Affx-200900007 | 0.0000257517              | 77.0116                       |
| rs17031488     | $6.80885 \times 10^{-7}$  | 2.03622                       |
| rs7599296      | $4.55229 \times 10^{-7}$  | 1.36138                       |

Supplementary Table S44: *For the gallstones predictor: list of SNPs located on the novel DYNC2L1 gene, and the corresponding variance values, both explicit and expressed as a percentage of the total predictor variance.*

Basal Cell Carcinoma Predictor SNPs located on IRF4 and TGM3

| SNP ID     | Variance Explained by SNP | % of Total Predictor Variance | Associated Gene |
|------------|---------------------------|-------------------------------|-----------------|
| rs12203592 | $9.11032 \times 10^{-7}$  | 28.4835                       | ENSG00000137265 |
| rs214803   | $3.86761 \times 10^{-7}$  | 12.0921                       | ENSG00000125780 |

Supplementary Table S48: *List of basal cell carcinoma predictor SNPs located on the IRF4 and TGM3 genes, and the corresponding variance values, both explicit and expressed as a percentage of the total predictor variance. The rightmost column displays the gene on which the SNP is located.*

Breast Cancer Predictor SNPs located on FGFR2 and TOX3

| SNP ID     | Variance Explained by SNP | % of Total Predictor Variance | Associated Gene |
|------------|---------------------------|-------------------------------|-----------------|
| rs2981575  | 0.000020383               | 14.1895                       | ENSG00000066468 |
| rs4784227  | 0.000020051               | 13.9264                       | ENSG00000103460 |
| rs2981579  | $8.2982 \times 10^{-7}$   | 0.577674                      | ENSG00000066468 |
| rs1219648  | $2.33801 \times 10^{-8}$  | 0.0162759                     | ENSG00000066468 |
| rs45512493 | $1.10672 \times 10^{-8}$  | 0.00770439                    | ENSG00000103460 |
| rs3803662  | $7.29627 \times 10^{-10}$ | 0.000507925                   | ENSG00000103460 |
| rs4784220  | $3.98991 \times 10^{-10}$ | 0.000277755                   | ENSG00000103460 |

Supplementary Table S49: *List of breast cancer predictor SNPs located on the FGFR2 and TOX3 genes, and the corresponding variance values, both explicit and expressed as a percentage of the total predictor variance. The rightmost column displays the gene on which the SNP is located.*

Glaucoma SNPs on ALDH9A1

| SNP ID    | Variance Explained by SNP | % of Total Predictor Variance |
|-----------|---------------------------|-------------------------------|
| rs4656461 | $1.91058 \times 10^{-6}$  | 19.1727                       |

Supplementary Table S45: *For the glaucoma predictor: list of SNPs located on the novel ALDH9A1 gene, and the corresponding variance values, both explicit and expressed as a percentage of the total predictor variance.*

| Type-2 Diabetes Predictor SNPs located on TCF7L2 |                           |                               |                 |
|--------------------------------------------------|---------------------------|-------------------------------|-----------------|
| SNP ID                                           | Variance Explained by SNP | % of Total Predictor Variance | Associated Gene |
| rs7903146                                        | 0.000044865               | 24.7623                       | ENSG00000148737 |
| rs34855922                                       | $5.22513 \times 10^{-8}$  | 0.028839                      | ENSG00000148737 |
| rs11196181                                       | $3.41416 \times 10^{-9}$  | 0.00188437                    | ENSG00000148737 |
| rs1362943                                        | $2.6939 \times 10^{-9}$   | 0.00148684                    | ENSG00000148737 |
| rs7908486                                        | $9.94264 \times 10^{-10}$ | 0.000548763                   | ENSG00000148737 |

Supplementary Table S50: List of type-2 diabetes predictor SNPs located on the TCF7L2 gene, and the corresponding variance values, both explicit and expressed as a percentage of the total predictor variance. The rightmost column displays the gene on which the SNP is located.

| Gout Predictor SNPs located on ABCG2 and SLC2A9 |                           |                               |                 |
|-------------------------------------------------|---------------------------|-------------------------------|-----------------|
| SNP ID                                          | Variance Explained by SNP | % of Total Predictor Variance | Associated Gene |
| rs2231142                                       | 0.000194608               | 54.8867                       | ENSG00000118777 |
| rs3775948                                       | $2.81558 \times 10^{-6}$  | 7.94098                       | ENSG00000109667 |
| rs16890979                                      | $7.25401 \times 10^{-7}$  | 2.0459                        | ENSG00000109667 |
| rs3114020                                       | $6.42128 \times 10^{-7}$  | 1.81104                       | ENSG00000118777 |
| rs16891234                                      | $4.02312 \times 10^{-7}$  | 1.13467                       | ENSG00000109667 |
| rs13129697                                      | $2.26603 \times 10^{-7}$  | 0.639104                      | ENSG00000109667 |
| rs73223775                                      | $1.58984 \times 10^{-7}$  | 0.448395                      | ENSG00000109667 |
| rs3114018                                       | $7.09016 \times 10^{-8}$  | 0.199569                      | ENSG00000118777 |
| rs737267                                        | $2.99228 \times 10^{-8}$  | 0.0843934                     | ENSG00000109667 |
| rs34783571                                      | $2.70102 \times 10^{-8}$  | 0.0761788                     | ENSG00000118777 |
| rs114756544                                     | $1.86542 \times 10^{-8}$  | 0.0526118                     | ENSG00000109667 |
| rs734553                                        | $1.19146 \times 10^{-8}$  | 0.0336035                     | ENSG00000109667 |
| rs6833878                                       | $1.95564 \times 10^{-9}$  | 0.00551565                    | ENSG00000109667 |
| rs73225891                                      | $1.45697 \times 10^{-9}$  | 0.00410921                    | ENSG00000109667 |
| rs3733591                                       | $5.42004 \times 10^{-10}$ | 0.00152865                    | ENSG00000109667 |

Supplementary Table S53: List of gout predictor SNPs located on the ABCG2 and SLC2A9 genes, and the corresponding variance values, both explicit and expressed as a percentage of the total predictor variance. The rightmost column displays the gene on which the SNP is located.

| Gallstones Predictor SNPs located on ABCG8, ABCG5, and DYNC2LI1 |                           |                               |                 |
|-----------------------------------------------------------------|---------------------------|-------------------------------|-----------------|
| SNP ID                                                          | Variance Explained by SNP | % of Total Predictor Variance | Associated Gene |
| Affx-20090007                                                   | 0.0000257517              | 77.0116                       | ENSG00000138036 |
| Affx-20090007                                                   | 0.0000257517              | 77.0116                       | ENSG00000138075 |
| Affx-20090007                                                   | 0.0000257517              | 77.0116                       | ENSG00000143921 |
| rs4245791                                                       | $1.48854 \times 10^{-6}$  | 4.45153                       | ENSG00000138075 |
| rs4245791                                                       | $1.48854 \times 10^{-6}$  | 4.45153                       | ENSG00000143921 |
| rs17031488                                                      | $6.80885 \times 10^{-7}$  | 2.03622                       | ENSG00000138036 |
| rs7599296                                                       | $4.55229 \times 10^{-7}$  | 1.36138                       | ENSG00000138036 |
| rs7599296                                                       | $4.55229 \times 10^{-7}$  | 1.36138                       | ENSG00000138075 |
| rs7599296                                                       | $4.55229 \times 10^{-7}$  | 1.36138                       | ENSG00000143921 |
| Affx-20090699                                                   | $1.36103 \times 10^{-7}$  | 0.407021                      | ENSG00000143921 |

Supplementary Table S51: List of gallstones predictor SNPs located on the ABCG8, ABCG5 and DYNC2LI1 genes, and the corresponding variance values, both explicit and expressed as a percentage of the total predictor variance. The rightmost column displays the gene on which the SNP is located.

| Glaucoma Predictor SNPs located on ALDH9A1 and TMC01 |                           |                               |                 |
|------------------------------------------------------|---------------------------|-------------------------------|-----------------|
| SNP ID                                               | Variance Explained by SNP | % of Total Predictor Variance | Associated Gene |
| rs4656461                                            | $1.91058 \times 10^{-6}$  | 19.1727                       | ENSG00000143149 |
| rs4656461                                            | $1.91058 \times 10^{-6}$  | 19.1727                       | ENSG00000143183 |

Supplementary Table S52: List of glaucoma predictor SNPs located on the ALDH9A1 and TMC01 genes, and the corresponding variance values, both explicit and expressed as a percentage of the total predictor variance. The rightmost column displays the gene on which the SNP is located.

| Heart Attack Predictor SNPs located on LPA |                           |                               |                 |
|--------------------------------------------|---------------------------|-------------------------------|-----------------|
| SNP ID                                     | Variance Explained by SNP | % of Total Predictor Variance | Associated Gene |
| rs10455872                                 | $4.42645 \times 10^{-6}$  | 14.4662                       | ENSG00000198670 |
| rs117733303                                | $2.05337 \times 10^{-6}$  | 6.71066                       | ENSG00000198670 |
| rs73596816                                 | $2.92187 \times 10^{-8}$  | 0.0954903                     | ENSG00000198670 |
| rs9457998                                  | $1.6105 \times 10^{-8}$   | 0.0526332                     | ENSG00000198670 |

Supplementary Table S54: List of heart attack predictor SNPs located on the LPA gene, and the corresponding variance values, both explicit and expressed as a percentage of the total predictor variance. The rightmost column displays the gene on which the SNP is located.

Malignant Melanoma Predictor SNPs located on AC092143.1, TUBB3, TCF25, MC1R and DEF8

| SNP ID        | Variance Explained by SNP | % of Total Predictor Variance | Associated Gene |
|---------------|---------------------------|-------------------------------|-----------------|
| Affx-35293625 | $4.57025 \times 10^{-7}$  | 34.4951                       | ENSG00000141002 |
| Affx-35293625 | $4.57025 \times 10^{-7}$  | 34.4951                       | ENSG00000258839 |
| Affx-35293625 | $4.57025 \times 10^{-7}$  | 34.4951                       | ENSG00000198211 |
| Affx-35293625 | $4.57025 \times 10^{-7}$  | 34.4951                       | ENSG00000258947 |
| Affx-35293625 | $4.57025 \times 10^{-7}$  | 34.4951                       | ENSG00000140995 |
| rs11538871    | $8.01617 \times 10^{-8}$  | 6.0504                        | ENSG00000141002 |
| rs11538871    | $8.01617 \times 10^{-8}$  | 6.0504                        | ENSG00000258839 |
| rs11538871    | $8.01617 \times 10^{-8}$  | 6.0504                        | ENSG00000198211 |
| rs11538871    | $8.01617 \times 10^{-8}$  | 6.0504                        | ENSG00000258947 |
| rs8063761     | $1.52938 \times 10^{-8}$  | 1.15434                       | ENSG00000198211 |
| rs8063761     | $1.52938 \times 10^{-8}$  | 1.15434                       | ENSG00000258947 |
| rs8063761     | $1.52938 \times 10^{-8}$  | 1.15434                       | ENSG00000140995 |
| rs1805008     | $7.82105 \times 10^{-9}$  | 0.590314                      | ENSG00000141002 |
| rs1805008     | $7.82105 \times 10^{-9}$  | 0.590314                      | ENSG00000258839 |
| rs1805008     | $7.82105 \times 10^{-9}$  | 0.590314                      | ENSG00000198211 |
| rs1805008     | $7.82105 \times 10^{-9}$  | 0.590314                      | ENSG00000258947 |
| rs1805008     | $7.82105 \times 10^{-9}$  | 0.590314                      | ENSG00000140995 |
| rs11547464    | $4.99642 \times 10^{-9}$  | 0.377118                      | ENSG00000141002 |
| rs11547464    | $4.99642 \times 10^{-9}$  | 0.377118                      | ENSG00000258839 |
| rs11547464    | $4.99642 \times 10^{-9}$  | 0.377118                      | ENSG00000198211 |
| rs11547464    | $4.99642 \times 10^{-9}$  | 0.377118                      | ENSG00000258947 |
| rs11547464    | $4.99642 \times 10^{-9}$  | 0.377118                      | ENSG00000140995 |
| rs1805009     | $1.77245 \times 10^{-9}$  | 0.13378                       | ENSG00000141002 |
| rs1805009     | $1.77245 \times 10^{-9}$  | 0.13378                       | ENSG00000258839 |
| rs1805009     | $1.77245 \times 10^{-9}$  | 0.13378                       | ENSG00000198211 |
| rs1805009     | $1.77245 \times 10^{-9}$  | 0.13378                       | ENSG00000258947 |
| rs1805009     | $1.77245 \times 10^{-9}$  | 0.13378                       | ENSG00000140995 |
| rs8049897     | $1.12683 \times 10^{-9}$  | 0.0850505                     | ENSG00000198211 |
| rs8049897     | $1.12683 \times 10^{-9}$  | 0.0850505                     | ENSG00000258947 |
| rs8049897     | $1.12683 \times 10^{-9}$  | 0.0850505                     | ENSG00000140995 |
| rs117204628   | $4.91714 \times 10^{-11}$ | 0.00371134                    | ENSG00000198211 |
| rs117204628   | $4.91714 \times 10^{-11}$ | 0.00371134                    | ENSG00000258947 |
| rs117204628   | $4.91714 \times 10^{-11}$ | 0.00371134                    | ENSG00000140995 |

Supplementary Table S55: *List of malignant melanoma predictor SNPs located on the AC092143.1, TUBB3, TCF25, MC1R and DEF8 genes, and the corresponding variance values, both explicit and expressed as a percentage of the total predictor variance. The rightmost column displays the gene on which the SNP is located.*

Menopause Predictor SNPs located on UTY

| SNP ID    | Variance Explained by SNP | % of Total Predictor Variance | Associated Gene |
|-----------|---------------------------|-------------------------------|-----------------|
| rs1236440 | 0.339579                  | 24.2854                       | ENSG00000183878 |

Supplementary Table S56: *List of menopause predictor SNPs located on the UTY gene, and the corresponding variance values, both explicit and expressed as a percentage of the total predictor variance. The rightmost column displays the gene on which the SNP is located.*

## Appendix C: Supplementary Methods

### UK Biobank Array Sequencing Data

Predictors (with the exception of the CAD predictor from [1]) were originally trained using the 2018 release of the UK Biobank data. Predictor training was restricted to genetically British individuals (as defined using ancestry principal component analysis performed by UK Biobank) [2, 3]. In 2018, the UK Biobank re-released the dataset representing approximately 500,000 individuals genotyped on two Affymetrix platforms - approximately 50,000 samples on the UKB BiLEVE Axiom array and the remainder on the UKB Biobank Axiom array. The genotype information was collected for 488,377 individuals, and 805,426 SNPs, which were then subsequently imputed to a much larger number of SNPs. More details about the design of the array can be found on these documents from the UK Biobank website: an Axiom array content summary: <http://www.ukbiobank.ac.uk/wp-content/uploads/2014/04/UK-Biobank-Axiom-Array-Content-Summary-2014-1.pdf>, and the document detailing the Axiom array: <http://www.ukbiobank.ac.uk/wp-content/uploads/2014/04/UK-Biobank-Axiom-Array-Datasheet-2014-1.pdf>. Further information about the genotyping and phenotyping used to build the original predictors can be found in [1, 4].

### UK Biobank Exome Sequencing Data

In March 2019, the UK Biobank released whole-exome sequencing (WES) data for 49,960 participants [5]. Selection of participants for the study prioritized individuals with whole-body MRI imaging data from the UK Biobank Imaging Study, enhanced baseline measurements, hospital episode statistics (HES), linked primary

| Phenotype            | # Case Train | # Control Train | # Case Val | # Control Val | # Active |
|----------------------|--------------|-----------------|------------|---------------|----------|
| asthma               | 46,692       | 354,153         | 500        | 500           | 13,386   |
| atrial fibrillation  | 2,939        | 397,906         | 500        | 500           | 207      |
| basal cell carcinoma | 3,624        | 397,221         | 500        | 500           | 116      |
| breast cancer        | 8977         | 208,716         | 200        | 200           | 1,805    |
| type-1 diabetes      | 11,006       | 390,439         | 500        | 500           | 3,175    |
| type-2 diabetes      | 2,223        | 398,622         | 500        | 500           | 3,479    |
| gallstones           | 17,210       | 394,409         | 500        | 500           | 274      |
| glaucoma             | 3,991        | 396,854         | 500        | 500           | 1,385    |
| gout                 | 541          | 395,444         | 500        | 500           | 766      |
| heart attack         | 8,960        | 391,885         | 500        | 500           | 1,433    |
| high cholesterol     | 51,405       | 349,440         | 500        | 500           | 6,390    |
| hypertension         | 106,287      | 294,558         | 500        | 500           | 17,753   |
| hypothyroidism       | 19,816       | 381,029         | 500        | 500           | 5,953    |

Supplementary Table S57: *The number of cases and controls used in the training and validation sets for case-control phenotypes, and the sizes of the resultant active sets.*

care records, and admission to hospital with a primary diagnosis of asthma. In regards to age, sex and ancestry, the sequenced individuals are representative of the overall UK Biobank cohort. The sample set has 194 parent-offspring pairs, including 26 mother-father-child trios, 613 full-sibling pairs, 1 monozygotic twin pair and 195 second-degree genetically determined relationships.

Exomes were captured using a version of the IDT xGen Exome Research Panel v1.0. Multiplexed samples were sequenced with dual-indexed 75 x 75 bp paired-end reads on the Illumina NovaSeq 6000 platform using S2 flow cells. The specific genomic regions targeted for sequencing covered 39 megabases of the human genome, corresponding to 19,396 genes. In addition, the regions measuring 100 bp and located directly upstream and downstream of each target region were also sequenced.

A total of 4,735,722 variants located in targeted regions were identified. With adjacent (non-targeted) 100 bp regions included in the tally, a total of 9,693,526 indel and single nucleotide variants (SNVs) were observed. While only the target regions are required to meet all sequencing quality standards such as unique read coverage, variants in both target and adjacent regions were subjected to the same variant quality control metrics. Approximately 14% of coding variants identified via whole-exome sequencing were observed in the imputed sequence of 49,797 participants with both whole-exome sequencing and imputed data. 22.6% of the coding variants in the imputed data were not observed in the whole-exome sequencing data.

### ***About Our Predictors***

Predictors were derived as follows: For every phenotype considered, a small subset of the genetically British grouping of UK Biobank participants was set aside for validation, and then the predictors were trained on a large remaining subset - see Supplementary Tables S57 and S58 for the exact training and validation set sizes. Cross-validation was performed several times, and one predictor was randomly selected as the representative predictor for that particular phenotype. Each predictor consists of a set of SNP ID's, weights, effect alleles, and a value of the penalization parameter  $\lambda$ . True out-of-sample testing and adjacent ancestry testing was performed for many of these predictors in [4, 6]. More information can be found in the Methods section of the main text, and in [4, 6].

As described in the Methods section of the main text, the L1-penalized LASSO regression is not expected to output weights such that  $X \cdot \beta$  is of order 1. However, we can still record what the total value of variance,  $\sum 2\beta_i^2 f_i(1 - f_i)$ , is for each predictor (Supplementary Table S59).

| Phenotype                | # Train | # Control | # Active |
|--------------------------|---------|-----------|----------|
| diastolic blood pressure | 428,981 | 5,000     | 18,383   |
| education years          | 450,637 | 5,000     | 19,498   |
| height                   | 416,452 | 39,787    | 25,829   |
| menopause                | 115,847 | 5,000     | 6,170    |
| pulse rate               | 428,981 | 5,000     | 16,941   |
| systolic blood pressure  | 428,977 | 5,000     | 17,097   |

Supplementary Table S58: *The sizes of the training and control sets for continuous phenotypes, and the sizes of the resultant active sets.*

| Phenotype                | $\sum_i 2\beta_i^2 f_i(1 - f_i)$ |
|--------------------------|----------------------------------|
| asthma                   | 0.0016                           |
| atrial fibrillation      | 58e-7                            |
| basal cell carcinoma     | 32e-7                            |
| breast cancer            | 14e-5                            |
| coronary artery disease  | 0.0025                           |
| type-1 diabetes          | 12e-6                            |
| type-2 diabetes          | 18e-5                            |
| diastolic blood pressure | 0.033                            |
| education years          | 0.05                             |
| gallstones               | 33e-6                            |
| glaucoma                 | 1e-5                             |
| gout                     | 35e-6                            |
| heart attack             | 31e-6                            |
| height                   | 0.23                             |
| high cholesterol         | 0.0014                           |
| hypertension             | 0.0052                           |
| hypothyroidism           | 45e-5                            |
| malignant melanoma       | 13e-7                            |
| menopause                | 1.4                              |
| pulse rate               | 0.041                            |
| systolic blood pressure  | 0.029                            |

Supplementary Table S59: *Values of total predictor variance,  $\sum_i 2\beta_i^2 f_i(1 - f_i)$ , for each phenotype that we consider in this paper. Each value is rounded to two significant figures.*

## Appendix D: Supplementary Note

### *SNP-Based Heritability and Genetic Correlations of Phenotypes*

Supplementary Table S60 displays a list of previously published estimates of the SNP-based heritability calculated using REML methods, for each phenotype that we consider.

The Neale lab has produced a large, ongoing analysis of heritability, genetic correlations, and GWAS analysis of thousands of UK Biobank phenotypes [22]. Using the heritability and genetic correlation browser from [22], we quote the SNP-based heritability and genetic correlations calculated by them for our selection of phenotypes in Supplementary Table S61 and Supplementary Figures S62 and S63.

The Neale group uses LD Score regression [23] to estimate heritability. It is stressed that this method of estimating heritability is very rough, and the authors hint that other methods, like REML or linear mixed models, might give more precise estimates. (These other models are also very sensitive to SNP content, sample sizes, and biases [24–31]). For this reason, we only quote the genetic heritability central value,  $h_g^2$ , and the  $p$ -value associated with whether any genetic heritability has been measured. To reproduce these results, find standard errors, sample sizes, etc. - see [22].

| Phenotype                | Published Values of $h_g^2$ Estimated Using REML Methods                                               |
|--------------------------|--------------------------------------------------------------------------------------------------------|
| asthma                   | 0.152(0.018)[7]; 0.264(0.067)[8]                                                                       |
| atrial fibrillation      | 0.096(0.012)[9]; 0.221(0.064)[10]; 0.238(0.025)[11]                                                    |
| basal cell carcinoma     | N/A                                                                                                    |
| breast cancer            | 0.117(0.051)[8]; 0.13(0.13)[12]                                                                        |
| CAD                      | 0.092(0.015)[7]; 0.159(0.002)[13]; 0.146(0.017)[8]; 0.216(0.016)[11]                                   |
| type-1 diabetes          | 0.32(0.04)[14]                                                                                         |
| type-2 diabetes          | 0.297(0.022)[7]; 0.073(0.002)[13]; 0.254(0.041)[8]; 0.51(0.065)[15]                                    |
| diastolic blood pressure | 0.197(0.005)[11]                                                                                       |
| education years          | 0.194(0.002)[13]                                                                                       |
| gallstones               | N/A                                                                                                    |
| glaucoma                 | 0.42(0.09)[16]                                                                                         |
| gout                     | 0.236(0.160)[17]; 0.27(0.04)[18]                                                                       |
| heart attack             | 0.190(0.025)[11]; 0.41(0.067)[15]                                                                      |
| height                   | 0.578(0.002)[13]; 0.50(0.18)[19]; 0.46(0.05)[19];<br>0.45(0.08)[20]; 0.399(0.017)[8]; 0.614(0.004)[11] |
| high cholesterol         | N/A                                                                                                    |
| hypertension             | 0.255(0.014)[7]; 0.310(0.008)[11]                                                                      |
| hypothyroidism           | 0.086(0.002)[13]                                                                                       |
| malignant melanoma       | 0.19(0.18)[12]; 0.3(0.2)[12]                                                                           |
| menopause                | 0.136(0.053)[8]                                                                                        |
| pulse rate               | 0.13(0.01)[21]                                                                                         |
| systolic blood pressure  | 0.198(0.005)[11]; 0.24(0.05)[19]                                                                       |

Supplementary Table S60: *Previously published estimates of the SNP-based heritability (with the standard error in parentheses and corresponding citation in square brackets directly following each estimate) calculated using REML methods, for each phenotype that we consider. All genetic data sets used were restricted to participants with majority European or British ancestry.*

| Phenotype                | $h_g^2$ | $p$ -value | Phenotype               | $h_g^2$ | $p$ -value |
|--------------------------|---------|------------|-------------------------|---------|------------|
| asthma                   | 0.170   | 2.81e-36   | height                  | 0.485   | 6.14e-110  |
| atrial fibrillation      | 0.144   | 1.27e-8    | high cholesterol        | 0.126   | 3.22e-25   |
| basal cell carcinoma     | 0.178   | 4.02e-6    | hypertension            | 0.238   | 4.24e-116  |
| breast cancer            | 0.144   | 8.15e-09   | hypothyroidism          | 0.232   | 1.58e-22   |
| diastolic blood pressure | 0.143   | 1.10e-135  | malignant melanoma      | 0.127   | 0.00296    |
| education Years          | 0.105   | 1.15e-108  | menopause               | 0.115   | 1.41e-19   |
| gallstones               | 0.0867  | 3.67e-5    | pulse rate              | 0.143   | 2.16e-25   |
| glaucoma                 | 0.128   | 1.90e-5    | systolic blood pressure | 0.151   | 4.93e-126  |
| gout                     | 0.248   | 1.09e-4    | type-1 diabetes         | 0.219   | 0.0225     |
| heart attack             | 0.144   | 7.06e-13   | type-2 diabetes         | 0.123   | 0.00274    |

Supplementary Table S61: *SNP-based heritability estimates,  $h_g^2$ , and the corresponding  $p$ -values, calculated using LD score regression in [22].*



|                     | menopause | high cholesterol | height | hypothyroidism | heart attack | pulse rate | asthma | diastolic bp | hypertension | systolic bp | edu years | atrial fibrillation |
|---------------------|-----------|------------------|--------|----------------|--------------|------------|--------|--------------|--------------|-------------|-----------|---------------------|
| menopause           | 1         | -0.08            | 0.02   | -0.05          | -0.11        | -0.04      | -0.11  | -0.06        | -0.08        | -0.02       | 0.19      | 0.05                |
| high cholesterol    | -0.08     | 1                | -0.2   | 0.17           | 0.6          | 0.13       | 0.09   | 0.37         | 0.57         | 0.42        | -0.26     | 0.02                |
| height              | 0.02      | -0.2             | 1      | 0.01           | -0.18        | -0.08      | -0.08  | -0.12        | -0.12        | -0.15       | 0.23      | 0.24                |
| hypothyroidism      | -0.05     | 0.17             | 0.01   | 1              | 0.18         | -0.05      | 0.07   | 0.05         | 0.1          | 0.01        | -0.12     | 0.02                |
| heart attack        | -0.11     | 0.6              | -0.18  | 0.18           | 1            | 0.13       | 0.13   | 0.34         | 0.51         | 0.35        | -0.38     | 0.17                |
| pulse rate          | -0.04     | 0.13             | -0.08  | -0.05          | 0.13         | 1          | 0.08   | 0.29         | 0.11         | 0.03        | -0.09     | -0.03               |
| asthma              | -0.11     | 0.09             | -0.08  | 0.07           | 0.13         | 0.08       | 1      | 0.07         | 0.11         | 0.06        | -0.14     | 0.02                |
| diastolic bp        | -0.06     | 0.37             | -0.12  | 0.05           | 0.34         | 0.29       | 0.07   | 1            | 0.78         | 0.67        | -0.24     | 0.15                |
| hypertension        | -0.08     | 0.57             | -0.12  | 0.1            | 0.51         | 0.11       | 0.11   | 0.78         | 1            | 0.79        | -0.29     | 0.17                |
| systolic bp         | -0.02     | 0.42             | -0.15  | 0.01           | 0.35         | 0.03       | 0.06   | 0.67         | 0.79         | 1           | -0.21     | 0.16                |
| edu years           | 0.19      | -0.26            | 0.23   | -0.12          | -0.38        | -0.09      | -0.14  | -0.24        | -0.29        | -0.21       | 1         | -0.02               |
| atrial fibrillation | 0.05      | 0.02             | 0.24   | 0.02           | 0.17         | -0.03      | 0.02   | 0.15         | 0.17         | 0.16        | -0.02     | 1                   |

Supplementary Figure S62: *Genetic correlation estimates for some of the phenotypes examined in this paper. Results are quoted from [22]. Notable overlaps are: heart attack and high cholesterol at .6, hypertension and high cholesterol at .57, hypertension and heart attack at .51, systolic blood pressure and hypertension at .79, hypertension and diastolic blood pressure at .78, systolic blood pressure and diastolic blood pressure at .67, and diastolic blood pressure and pulse rate at .29.*

|                     | menopause | high cholesterol | height | hypothyroidism | heart attack | pulse rate | asthma | diastolic bp | hypertension | systolic bp | edu years | atrial fibrillation |
|---------------------|-----------|------------------|--------|----------------|--------------|------------|--------|--------------|--------------|-------------|-----------|---------------------|
| menopause           | -100      | -1.4             | -0.5   | -0.57          | -1.7         | -0.62      | -2.4   | -1.4         | -2.2         | -0.28       | -8.3      | -0.54               |
| high cholesterol    | -1.4      | -100             | -23    | -4.5           | -35          | -2.9       | -2.4   | -27          | -67          | -37         | -14       | -0.15               |
| height              | -0.5      | -23              | -100   | -0.092         | -8.8         | -3.5       | -4.4   | -10          | -8.6         | -18         | -47       | -13                 |
| hypothyroidism      | -0.57     | -4.5             | -0.092 | -100           | -3.2         | -0.72      | -1.1   | -0.61        | -1.9         | -0.11       | -3.7      | -0.22               |
| heart attack        | -1.7      | -35              | -8.8   | -3.2           | -100         | -2.6       | -3     | -16          | -47          | -17         | -20       | -2.1                |
| pulse rate          | -0.62     | -2.9             | -3.5   | -0.72          | -2.6         | -100       | -2.2   | -32          | -5.7         | -0.6        | -2.5      | -0.25               |
| asthma              | -2.4      | -2.4             | -4.4   | -1.1           | -3           | -2.2       | -100   | -2.4         | -4.2         | -1.7        | -7.6      | -0.19               |
| diastolic bp        | -1.4      | -27              | -10    | -0.61          | -16          | -32        | -2.4   | -100         | -100         | -100        | -31       | -4.5                |
| hypertension        | -2.2      | -67              | -8.6   | -1.9           | -47          | -5.7       | -4.2   | -100         | -100         | -100        | -38       | -6.1                |
| systolic bp         | -0.28     | -37              | -16    | -0.11          | -17          | -0.6       | -1.7   | -100         | -100         | -100        | -24       | -4.1                |
| edu years           | -8.3      | -14              | -47    | -3.7           | -20          | -2.5       | -7.6   | -31          | -38          | -24         | -100      | -0.19               |
| atrial fibrillation | -0.54     | -0.15            | -13    | -0.22          | -2.1         | -0.25      | -0.19  | -4.5         | -6.1         | -4.1        | -0.19     | -100                |

Supplementary Figure S63:  $\text{Log}_{10}(p\text{-value})$  corresponding to the genetic correlation results cited in Supplementary Figure S62. Values of  $-100$  correspond to  $p$ -values that are 0 to within floating precision. All values are quoted from [22].

## References

1. Khera, A. V. *et al.* Genome-wide polygenic scores for common diseases identify individuals with risk equivalent to monogenic mutations. *Nature genetics* **50**, 1219 (2018) (cit. on p. 20).
2. Sudlow, C. *et al.* UK biobank: an open access resource for identifying the causes of a wide range of complex diseases of middle and old age. *PLoS medicine* **12**, 3 (2015) (cit. on p. 20).
3. Bycroft, C., Freeman, C. & Petkova, D. The UK Biobank resource with deep phenotyping and genomic data. *Nature* **562**, 203–209 (cit. on p. 20).

4. Lello, L., Raben, T. G., Yong, S. Y., Tellier, L. C. & Hsu, S. D. H. Genomic prediction of 16 complex disease risks including heart attack, diabetes, breast and prostate cancer. *Sci Rep* **9**, 2019 (2019) (cit. on pp. 20, 21).
5. Van Hout, C. V. *et al.* Whole exome sequencing and characterization of coding variation in 49,960 individuals in the UK Biobank. *bioRxiv* (2019) (cit. on p. 20).
6. Lello, L. *et al.* Accurate genomic prediction of human height. *Genetics* **210**, 477–497 (2018) (cit. on p. 21).
7. Loh, P.-R. *et al.* Contrasting genetic architectures of schizophrenia and other complex diseases using fast variance-components analysis. *Nature genetics* **47**, 1385 (2015) (cit. on p. 24).
8. Zaitlen, N. *et al.* Using extended genealogy to estimate components of heritability for 23 quantitative and dichotomous traits. *PLoS genetics* **9** (2013) (cit. on p. 24).
9. Nielsen, J. B. *et al.* Genome-wide study of atrial fibrillation identifies seven risk loci and highlights biological pathways and regulatory elements involved in cardiac development. *The American Journal of Human Genetics* **102**, 103–115 (2018) (cit. on p. 24).
10. Weng, L.-C. *et al.* Heritability of atrial fibrillation. *Circulation: Cardiovascular Genetics* **10**, e001838 (2017) (cit. on p. 24).
11. Verweij, N., Eppinga, R. N., Hagemeijer, Y. & van der Harst, P. Identification of 15 novel risk loci for coronary artery disease and genetic risk of recurrent events, atrial fibrillation and heart failure. *Scientific reports* **7**, 1–9 (2017) (cit. on p. 24).
12. Lu, Y. *et al.* Most common ‘sporadic’ cancers have a significant germline genetic component. *Human molecular genetics* **23**, 6112–6118 (2014) (cit. on p. 24).
13. Loh, P.-R., Kichaev, G., Gazal, S., Schoech, A. P. & Price, A. L. Mixed-model association for biobank-scale datasets. *Nature genetics* **50**, 906–908 (2018) (cit. on p. 24).
14. Lee, S. H., Wray, N. R., Goddard, M. E. & Visscher, P. M. Estimating missing heritability for disease from genome-wide association studies. *The American Journal of Human Genetics* **88**, 294–305 (2011) (cit. on p. 24).
15. Stahl, E. A. *et al.* Bayesian inference analyses of the polygenic architecture of rheumatoid arthritis. *Nature genetics* **44**, 483 (2012) (cit. on p. 24).
16. Cuellar-Partida, G. *et al.* Assessment of polygenic effects links primary open-angle glaucoma and age-related macular degeneration. *Scientific reports* **6**, 1–6 (2016) (cit. on p. 24).
17. Cadzow, M., Merriman, T. R. & Dalbeth, N. Performance of gout definitions for genetic epidemiological studies: analysis of UK Biobank. *Arthritis research & therapy* **19**, 181 (2017) (cit. on p. 24).
18. Köttgen, A. *et al.* Genome-wide association analyses identify 18 new loci associated with serum urate concentrations. *Nature genetics* **45**, 145–154 (2013) (cit. on p. 24).
19. Vattikuti, S., Guo, J. & Chow, C. C. Heritability and genetic correlations explained by common SNPs for metabolic syndrome traits. *PLoS genetics* **8** (2012) (cit. on p. 24).
20. Yang, J. *et al.* Common SNPs explain a large proportion of the heritability for human height. *Nature genetics* **42**, 565 (2010) (cit. on p. 24).
21. Speed, D., Holmes, J. & Balding, D. J. Evaluating and improving heritability models using summary statistics. *Nature Genetics* **52**, 458–462 (2020) (cit. on p. 24).
22. *MS Windows NT Kernel Description* <http://www.nealelab.is/uk-biobank/>. Accessed: 2020-05-23 (cit. on pp. 23–26).
23. Bulik-Sullivan, B. K. *et al.* LD Score regression distinguishes confounding from polygenicity in genome-wide association studies. *Nature genetics* **47**, 291 (2015) (cit. on p. 23).
24. Schreck, N., Piepho, H.-P. & Schlather, M. Best prediction of the additive genomic variance in random-effects models. *Genetics* **213**, 379–394 (2019) (cit. on p. 23).
25. Speed, D. *et al.* Reevaluation of SNP heritability in complex human traits. *Nature genetics* **49**, 986 (2017) (cit. on p. 23).

26. Lee, J. J. & Chow, C. C. Conditions for the validity of SNP-based heritability estimation. *Human genetics* **133**, 1011–1022 (2014) (cit. on p. 23).
27. De los Campos, G., Sorensen, D. & Gianola, D. Genomic heritability: what is it? *PLoS Genetics* **11** (2015) (cit. on p. 23).
28. Yang, J., Lee, S. H., Wray, N. R., Goddard, M. E. & Visscher, P. M. GCTA-GREML accounts for linkage disequilibrium when estimating genetic variance from genome-wide SNPs. *Proceedings of the National Academy of Sciences* **113**, E4579–E4580 (2016) (cit. on p. 23).
29. Kumar, S. K., Feldman, M. W., Rehkopf, D. H. & Tuljapurkar, S. Response to Commentary on "Limitations of GCTA as a solution to the missing heritability problem". *BioRxiv*, 039594 (2016) (cit. on p. 23).
30. Kumar, S. K., Feldman, M. W., Rehkopf, D. H. & Tuljapurkar, S. Limitations of GCTA as a solution to the missing heritability problem. *Proceedings of the National Academy of Sciences* **113**, E61–E70 (2016) (cit. on p. 23).
31. Gamazon, E. R. & Park, D. S. SNP-based heritability estimation: measurement noise, population stratification and stability. *BioRxiv*, 040055 (2016) (cit. on p. 23).
